# Supplementary material for: Notochord vacuoles absorb compressive bone growth during zebrafish spine formation
Source: eLife. 2020 Jan 29;9:e51221. doi: 10.7554/eLife.51221 (PMC7012607; doi:10.7554/eLife.51221)
Supplement: Source data 1. [file elife-51221-data1.xlsx]

## Sheet: fig. 1B body length
spzl body length	(in mm)
mut						WT
number	2dpf	3dpf	4 dpf	5 dpf		number	2 dpf	3 dpf	4 dpf	5 dpf
1	2.272	2.911	2.773	3.148		1	2.924	3.364	3.83	3.921
2	2.319	2.639	3.291	3.33		2	3.035	3.491	3.669	3.958
3	2.459	2.712	2.963	3.095		3	2.987	3.7	3.849	3.956
4	2.245	2.926	2.897	3.386		4	3.048	3.634	3.73	3.914
5	2.508	2.791	3.085	3.178		5	3.074	3.495	3.838	4.002
6	2.547	2.788	2.941	3.302		6	3.018	3.336	3.869	3.641
7	2.512	2.692	2.961	3.22		7	2.968	3.444	3.786	3.859
8	2.493	2.737	3.015	3.139		8	2.83	3.612	3.702	3.907
9	2.557	2.891	3.117	3.539		9	2.932	3.516	3.864	3.921
10	2.308	2.938	3.159	3.058		10	2.842	3.56	3.784	4.047
11	2.414	2.668	3.328	3.551		11	2.801	3.585	3.877	3.879
12	2.444	2.924	3.156	3.436		12	2.772	3.581	3.901	4.057
13	2.508	2.791	3.146	3.147		13	3.14	3.575	3.775	4.038
14	2.394	2.718	3.195	3.457		14	2.852	3.281	3.698	3.837
15	2.431	2.781	3.413	3.46		15	2.958	3.41	3.787	4.049
16	2.581	2.852	3.015	3.609		16	2.902	3.532	3.852	3.968
17	2.46	2.893	3.29	3.573		17	3.127	3.559	3.762	3.986
18	2.48	2.636	3.136	3.488		18	2.955	3.547	3.564	3.87
19	2.512	2.689	3.211	3.326		19	2.956	3.475	3.724	3.853
20	2.351	2.753	3.254	3.502		20	2.871	3.563	3.749	3.939
21	2.392	2.84	3.257	3.547		21	2.997	3.434	3.745	3.858
22	2.448	2.988	3.333	3.356		22	2.918	3.552	3.943	3.961
23	2.477	2.862	3.111	3.302		23	2.918	3.433	3.954	3.948
24	2.403	2.584	3.233	3.461		24	2.893	3.54	3.845	3.974
25	2.378	2.889	3.279	3.368		25	2.791	3.602	3.68	4.005
26	2.443	2.775	3.296	3.481		26	2.928	3.584	3.741	3.922
27	2.449	2.882	3.039	3.177		27	2.964	3.451	3.62	3.957
28		2.995	3.139	3.18		28	3.071	3.561	3.814	3.806
29		2.85	3.384			29	2.855	3.525	3.355	3.818
30		2.899				30	2.697	3.549	3.794	3.958
Average	2.43648	2.8098	3.15231	3.35057		Average	2.93413	3.51637	3.77003	3.92697
standard dev	0.0849513	0.109536	0.155592	0.163716		standard dev	0.104842	0.0912539	0.119204	0.0871952
SEM	0.0163489	0.0199985	0.0288927	0.0309395		SEM	0.0191414	0.0166606	0.0217636	0.0159196
2 dpf
1.15471e-25
			WT	spzl-/-
		48	2.93	2.44
		72	3.52	2.81
		96	3.77	3.15
		120 hpf	3.93	3.35

## Sheet: Figure 1I
	Length
spzl1	1829.78
spzl2	1892.63
spzl3	1860.74
spzl4	2000.36
spzl5	1790.71
WT1	2113.62
WT2	2125.19
WT3	2081.24
WT5	2147.22

## Sheet: Figure 1J
WT 1	WT 2	WT 3	WT 5		spzl 1	spzl 2	spzl 3	spzl 4	spzl 5
n=147	n=150	n=144	n=145		n=128	n=154	n=143	n=127	n=126

## Sheet: Figure 1K
vac .cell volume
WT 1	WT 2	WT 3	WT 5		spzl 1	spzl 2	spzl 3	spzl 4	spzl 5
35303.2	36204.1	28461.4	17249.9		14930.5	44343.7	6826.64	5064.69	44649.7
36805.6	32755.8	20999	13966.4		24165.9	51620.8	11169	9411.15	33912
11714.2	33951.9	27434.2	6475.07		44765.4	43089.9	19910	22590.6	33219.8
35962.4	37492.3	58796	35207.1		27599.2	40716.8	7353.99	47189	28704.5
31267.1	33930	36735.5	24951.3		35063	12534.1	15041.7	29205.7	22828.2
34222.5	28212.9	37136.5	28988.8		14653.1	4743.36	28829.6	16512.4	37923.3
39111.4	30601.1	29631.5	28986.1		11940.8	29319.9	10935.5	15899.9	45096
36307.1	37471.7	38483.7	36613.3		62012.6	13047.7	7360.85	53367.4	36706.6
44997.3	45501.3	44947.8	36676.5		10143.2	18328	5939.5	50570	39635.8
39973.8	29020.4	73510.8	38248.9		61180.4	7380.09	19926.5	31427.7	39089.3
39130.6	38213.3	33511	29146.7		10699.4	8224.67	37931.8	39579.6	44895.5
45052.2	25485.6	46233.2	30426.6		52645.4	54585.7	35220.9	7936.24	40998.1
37797.1	39647	46535.3	31622.8		27198.2	17495.8	37360.5	49746	27483.6
45795.2	38882.1	43089.7	32438.5		31224.7	13904.6	22723.9	35621.8	41496.6
43700.9	49956.3	37908.3	23146.8		48823.5	50106.1	10996	22519.2	35830.4
42561.1	37707.9	43839.5	29193.4		27207.8	18166	6639.88	13802.9	40369.2
39986.2	31442.9	44623.7	36048.9		28925.8	14581.7	30112.2	38397.2	37460.5
48845.3	41635.5	55730.8	34039.8		40495.8	33778.9	32692.6	51757.9	44178.7
40079.6	44148.7	43739.3	42279.5		42970.5	10721.3	13927.9	57584.8	14072.1
47320.9	45493.1	49220.1	32533.3		54017.3	21092.4	41181	11501.3	43390.4
39520.6	40281.5	37122.8	27920.4		28655.2	50042.9	12810.1	53338.6	30787.7
37573.3	43672.1	34652.2	36782.2		25834.5	29498.4	44954.8	40532.6	37772.3
39638.7	35119.2	38588.1	36653.1		38959.1	35888.3	33568.8	14698.3	16656.6
43343.9	44334	43055.4	46818.2		33151.4	9700.96	48333.1	27078.5	12402.2
50277.6	43629.5	37668	34931		29951.6	31510.3	22423.1	17310.3	7279.8
40828	39965.6	35689	43240.8		26326.1	66168.1	17285.7	15895.8	21645.8
45667.5	49411.1	44737.6	42952.4		26114.6	11756.8	34975	11406.5	35540.7
46053.4	43166.7	44049.6	49063.6		41418.7	11748.5	13731.6	13447.2	27636
45627.7	55089.7	40767.5	45719.6		28634.6	12734.6	25470.5	62810.1	10314.8
42967.6	46847.2	36466.3	39644.2		23211.5	30679.4	32846.4	23590.4	14344
43294.4	41950	51795	35201.6		25389.5	19587.3	21634.9	41588.7	7077.92
46586.2	46253.9	40211.3	37711.9		17965.5	7260.61	25389.5	20565	28465.5
44667.7	44373.9	44476.7	45060.4		7962.38	35256.6	26831.4	43593.7	9284.8
49894.5	43310.9	59024	46531.2		23341.9	13345.7	12940.5	12685.1	5798.02
46840.3	53088.8	32956.2	41862		14863.2	39056.5	40733.3	11965.5	7991.16
53889.4	40186.7	52691.7	39028.9		29781.3	10920.4	19315.4	16780.2	5218.49
43543	45219.8	40108.3	41108.1		22441.1	15758.6	18551.8	33237.7	21942.4
51834.9	53098.4	37978.3	11651		17379.1	16888.8	42260.4	37242.2	35040.8
58359.5	36551.6	10036	33804.9		15176.3	18079.4	6453.11	11519.2	25734
42676.4	42866	37966	34623.4		8732.8	14345.4	9585.59	27426	8809.64
48164.1	40385.8	38409.5	50133.4		4817.53	28000.1	16751.4	11255.5	6424.24
46642.5	57221	43273.7	35286.7		22566	9960.51	7933.52	21876.5	8919.5
48232.8	35606.8	31054.2	35562.7		9724.32	13031.2	17806.1	20610.3	10117
42451.2	40377.6	45627.5	58257.7		8903.09	26028.1	13882.6	9853.35	17144.1
48837	46941.9	43674.7	27783		19999.3	36461	7134.26	32479.7	29784.9
46325.3	44080	39385.9	41765.9		7654.76	17520.5	19511.8	26489.4	7198.7
41673.9	42003.6	45189.5	33634.6		6731.9	11511	4795.54	11814.4	7050.39
53222	9203.82	42569.2	42186.1		16170.6	30893.7	7319.66	14344	4673.25
53088.8	37135.2	42110.5	18926.7		14260.3	26641.9	12369.3	17587.7	4172
39658	41702.8	39965.5	37544.4		8463.63	29240.2	7922.53	19908.6	15938.2
40855.5	32342.4	21739.2	39859.8		4297.05	9430.42	24823.7	12620.5	4791.35
39611.3	38677.4	44945	41943.1		5355.86	22342.1	10424.7	32677.4	20715.8
41855.2	45346.2	34737.4	29400.8		7131.53	32746.2	12069.9	9461.96	7818.05
40741.5	47297.6	34223.7	41422.6		5174.58	12539.6	15000.5	9250.48	3787.49
41514.6	33825.6	38950.6	48793		10626.6	24763.3	11348.9	11385.9	7767.23
39480.8	39133.4	39402.4	40789.5		4787.31	45913.4	33207.6	7635.49	3198.35
36997.9	40020.5	39715.5	48662.6		3959.22	38382.2	27382.1	12793.6	4016.82
46374.7	79218.5	40573.8	35792.1		11123.7	11110	35237.3	25750.5	2749.29
37665.3	40189.4	32542.8	46501		8021.43	16897	15596.5	32590.9	7226.17
39075.7	44386.2	43559.4	37235.4		5729.4	33296.9	18730.4	28341.9	8039.14
39642.8	31407.2	39512.3	46358.2		4434.38	36675.2	14780.8	8404.53	4280.49
34166.2	44235.2	34414.6	37246.4		6843.14	32987.9	20536.2	13509	4388.98
28651	30307.2	36585.8	45129.1		9010.2	41377.4	25062.6	28714.1	2607.85
46142.6	43175	28583.6	29292.3		5575.59	29962.6	24205.7	11041.2	7412.93
39388.8	44286	38662.2	32367.1		3309.65	32400.2	23664.6	11432.6	2404.6
37111.9	45666.1	31692.8	37666.6		3867.21	14003.5	16060.7	12446.1	2683.38
40689.3	24040.9	34708.5	33475.3		3607.65	8570.74	6457.23	17288.3	2565.27
41539.4	48717.6	42846.6	46396.6		3839.74	19371.7	17118.1	3758.69	2618.83
33151.3	38065	35131.5	35249.6		4446.74	9471.62	11699.1	17532.8	2938.81
35882.8	35260.7	36699.8	36179.3		7673.99	11292.6	20147.6	13077.8	2536.44
33544.1	41141.1	34832.1	34946.1		7040.9	22329.8	9994.83	35727.5	1455.67
37128.3	39056.5	22333.8	35031.3		7367.74	7439.14	23825.3	9992.05	1400.74
35207.1	30878.5	27914.9	42716.2		4526.39	11846	10597.7	10044.2	1635.57
34244.4	40553.4	33096.3	34624.8		4537.38	14385.3	15170.8	10685.6	2454.04
31326.2	35119.2	32132.2	29790.8		3543.11	6806.05	13602.5	11236.3	8254.75
29694.7	37798.5	25205.4	27095		2651.84	28895.5	5214.4	23808.7	6597.21
30945.8	27739.2	31334.3	32249		4049.85	11251.4	11497.2	13682.1	4766.63
25502	42242.5	28454.6	32038.9		3508.77	13533.8	5837.87	5033.1	6183.85
18323.8	37110.5	19738.3	38261.3		2535.11	7432.27	7430.89	18764.6	4067.64
26391.9	34288.4	22398.3	26856.1		2745.22	9622.68	8053	8197.16	2967.64
18766	43209.3	22912	26374.1		2764.45	18650.7	8572.1	14029.5	3041.8
20898.8	36669.7	19278.2	29907.5		12915.9	7131.52	7027.14	22167.6	4828.43
17017.8	31227.3	14566.5	30562.6		8620.19	6369.34	8640.76	6318.5	1097.25
19492.5	31166.9	18226.3	21924.6		8400.43	6569.85	14107.8	14088.6	1952.79
17019.2	41197.4	17837.7	32623.9		38898.5	6420.16	8224.66	12163.2	6304.7
19531	33041.4	14304.2	26694		34446.3	12152.3	7020.28	22653.8	3194.23
15824.5	34225.2	14581.6	28554.8		35362.3	3571.94	8940.14	13032.5	22712.8
15722.8	40116.7	15275.1	22188.3		21125.4	5968.34	5424.51	13664.2	45384.4
17199.1	33876.4	7689.05	24407.5		44849	5292.68	5685.44	12588.9	54041.6
34245.8	19768.6	16403.9	30480.2		54891.9	5744.49	18043.7	4987.79	43389
33419.1	35035.5	26367.2	30761.7		49205.1	14934.6	8272.72	8160.08	46868.9
33725.3	18538.1	14293.2	28366.7		40473.7	4454.97	6808.79	3934.47	19665.5
41056	14905.7	18281.2	29582.1		26037.6	5961.48	18943.2	4292.9	2654.57
4628	21332.7	15456.4	27453.5		16855.8	3254.71	21493.4	9170.83	5955.95
33664.9	20260.2	16748.6	18008		11167.6	5615.4	6954.36	9519.64	7855.2
35818.2	15512.7	13101.2	20565		33767.8	5387.44	15332.8	2727.35	3834.22
38150.1	16082.6	7469.32	18874.5		3684.54	8675.11	18078	7838.73	21993.2
27369.7	13245.4	11475.2	20414		1709.75	6747	18950.1	5222.62	5874.92
32404.2	16717.1	14904.3	18170		3662.57	2878.43	5354.47	3530.73	10427.4
26327.4	14524	15773.6	17196.3		796.51	2760.32	17520.5	3588.4	7186.42
26560.9	15613	9667.96	14687.3		914.613	3044.6	14492.4	6774.44	6929.61
16956	19081.7	10814.7	21275		3831.49	5204.79	4553.84	14172.3	276.031
18948.7	27719.7	14897.4	15994.7		1181.03	3823.25	5285.81	21421.9	2173.91
20457.9	15298.3	9474.32	21258.5		1598.51	10350.5	11210.2	14489.6	1866.3
20140.7	18123.2	10566.1	18893.7		1153.57	3375.56	4832.62	21375.2	1623.23
12827.9	26283.2	14400.3	21119.8		15195.5	2963.57	8031.02	18288.1	950.315
18900.6	16450.5	14150.4	12891.1			2551.58	5370.95	12977.6	1499.63
16945.1	15400	11710	15043			4394.55	5910.66	9596.57	1535.34
13927.9	13447.2	5686.79	13132.8			1858.07	8194.44	12550.5	880.277
16136.2	16234.9	11971	11935.3			1753.7	4111.64	11777.4	1507.87
16235.1	16303.6	9786.06	7598.42			1532.6	4279.18	56166.3
16652.6	12617.7	8941.49	9688.56			1760.56	9533.41	42778
15887.6	13478.8	8202.66	15194.1			1682.29	2636.72
10996	13160.1	8173.82	11399.7			2517.25	3116
12558.8	10914.8	5118.25	6120.76			2298.9	4178.93
11266.5	5754.05	6656.33	8664.09			720.98	3830.12
9956.38	8033.69	3749.08	7485.81			1837.47	8348.25
11435.4	9416.59	4378.05	8529.51			1378.79	4275.06
8735.52	31574.5	5789.79	2599.64			1121.98	3681.8
5309.15	10850.3	5582.42	2668.3			1557.32	3334.36
9479.84	34752.6	3147.58	3506.01			653.689	2397.77
10518	29635.7	2044.83	2590.03			726.473	4206.4
7185.07	32909.6	1899.26	6373.44			1330.72	8874.22
3966.07	34633.1	7283.93	2986.91			11042.7	4340.98
6812.91	26389.2	7373.19	6785.43			15379.5	6337.75
4894.42	26249.1	1995.39	2715			43769.7	2916.88
4244.85	5398.42	26091.1	5918.88			9335.66	5103.16
3219	30724.7	35020.3	11911.9			15114.5	3116
7360.85	37068	25832.9	5462.95			23904.9	3381.05
4272.31	6709.92	11379.1	6444.85			36702.6	2682.04
5218.51	9187.34	25319.3	5188.29			32858.8	19283.8
1300.51	7910.18	33373.7	3534.85			11881.7
1402.13	9021.17	24886.7	1906.13			47963.7
1531.22	4498.91	19366.1	1485.9			30901.8
27051.1	4121.26	2296.14	1395.26			35307.4
38573.1	3044.59	3337.09	68487.4			13347
28640	4239.36	2515.87	23991.4			39545.4
33493.2	1306	4273.68	20911.1
25547.4	2601.02
42833	11281.6
30941.7
26354.9
39907.9

## Sheet: figure 1L WT
Vp					SAp					radius					SAs					sphericity
WT 1	WT 2	WT 3	WT 5		WT 1	WT 2	WT 3	WT 5		WT 1	WT 2	WT 3	WT 5		WT 1	WT 2	WT 3	WT 5		WT 1	WT 2	WT 3	WT 5
35303.2	36204.1	28461.4	17249.9		9053.71	8911.75	8195.21	6000.19		20.3539	20.5256	18.9436	16.0314		5203.39	5291.55	4507.28	3228.01		0.574725	0.593772	0.54999	0.537985
36805.6	32755.8	20999	13966.4		9117.98	8244.75	6731.12	5120.21		20.6387	19.8521	17.1176	14.9419		5349.99	4949.97	3680.24	2804.14		0.586752	0.600379	0.54675	0.547662
11714.2	33951.9	27434.2	6475.07		3619.55	8316.09	7927.48	3269.24		14.0912	20.0909	18.7129	11.5645		2493.94	5069.75	4398.17	1679.73		0.689019	0.609632	0.554801	0.513799
35962.4	37492.3	58796	35207.1		9456.05	9013.18	12707.6	8644.78		20.4798	20.7662	24.1264	20.3355		5267.97	5416.33	7310.99	5193.95		0.5571	0.600935	0.575324	0.600819
31267.1	33930	36735.5	24951.3		9301.19	8553.02	9522.82	7311.01		19.5467	20.0865	20.6256	18.1304		4798.83	5067.57	5343.2	4128.63		0.515938	0.592489	0.561094	0.564714
34222.5	28212.9	37136.5	28988.8		9469.32	7734	10255.7	7568.86		20.1441	18.8883	20.7003	19.0599		5096.65	4481.01	5382.01	4562.79		0.538228	0.579391	0.524783	0.602838
39111.4	30601.1	29631.5	28986.1		9960.29	8214.36	8203.58	7521.02		21.061	19.4069	19.1997	19.0593		5571.17	4730.45	4629.99	4562.51		0.559338	0.575875	0.564386	0.606635
36307.1	37471.7	38483.7	36613.3		9523.87	9247.99	9893.51	8610.51		20.5451	20.7624	20.9477	20.6027		5301.58	5414.35	5511.4	5331.34		0.556662	0.585462	0.557072	0.619167
44997.3	45501.3	44947.8	36676.5		10428.5	9907.72	11266.5	9001.15		22.0685	22.1506	22.0604	20.6145		6116.95	6162.54	6112.46	5337.48		0.586561	0.621994	0.542534	0.592977
39973.8	29020.4	73510.8	38248.9		9369.07	7198.46	14203	9253.14		21.2146	19.0668	25.9913	20.905		5652.77	4566.11	8484.86	5488.96		0.603343	0.634318	0.597399	0.5932
39130.6	38213.3	33511	29146.7		10155.1	9790.56	9519.02	7965.92		21.0644	20.8985	20.0035	19.0944		5572.99	5485.55	5025.77	4579.35		0.548787	0.56029	0.527971	0.574867
45052.2	25485.6	46233.2	30426.6		10684.6	7065.33	11668.5	8169.09		22.0775	18.2589	22.2687	19.3699		6121.93	4187.36	6228.45	4712.45		0.572967	0.592663	0.533783	0.576863
37797.1	39647	46535.3	31622.8		9911.37	9644.52	11165.4	8016.48		20.8224	21.1567	22.3171	19.6205		5445.65	5621.91	6255.55	4835.16		0.549435	0.582913	0.560262	0.603153
45795.2	38882.1	43089.7	32438.5		10465.6	9748.47	10540.2	8269.02		22.1982	21.0197	21.7521	19.7878		6189.05	5549.37	5942.83	4917.96		0.591371	0.569256	0.563825	0.594745
43700.9	49956.3	37908.3	23146.8		10015.3	11341.2	10154.9	6884.81		21.8545	22.8511	20.8428	17.6824		5998.89	6558.5	5456.33	3927.09		0.598973	0.578289	0.53731	0.5704
42561.1	37707.9	43839.5	29193.4		10318	9649.9	11067.3	8143.74		21.6628	20.806	21.8776	19.1046		5894.12	5437.08	6011.57	4584.24		0.571247	0.563434	0.543183	0.562916
39986.2	31442.9	44623.7	36048.9		9917.43	7877.42	11493.7	9018.97		21.2168	19.5832	22.0072	20.4963		5653.93	4816.81	6083.05	5276.41		0.570101	0.61147	0.52925	0.585035
48845.3	41635.5	55730.8	34039.8		11997.2	9592.48	12434.5	8873.34		22.6804	21.5046	23.6997	20.1082		6460.89	5808.36	7054.63	5078.5		0.538533	0.605511	0.567343	0.572332
40079.6	44148.7	43739.3	42279.5		9390.12	10968.6	11126.7	9800.65		21.2333	21.9289	21.8609	21.6149		5662.74	6039.8	6002.4	5868.1		0.603053	0.550645	0.53946	0.598746
47320.9	45493.1	49220.1	32533.3		10420.3	10051.1	12294.7	8274.45		22.442	22.1493	22.7383	19.8071		6325.76	6161.8	6493.9	4927.53		0.607061	0.613048	0.528187	0.595512
39520.6	40281.5	37122.8	27920.4		9582.37	10452.7	9419.76	7226.44		21.1342	21.2689	20.6978	18.8228		5609.96	5681.74	5380.69	4449.98		0.585446	0.543566	0.571213	0.615792
37573.3	43672.1	34652.2	36782.2		9701.67	10098.9	9647.63	10408.4		20.7812	21.8497	20.2281	20.6343		5424.13	5996.26	5139.23	5347.73		0.559093	0.593753	0.532693	0.513789
39638.7	35119.2	38588.1	36653.1		9541.34	8907.95	11050.5	9290.36		21.1552	20.3185	20.9666	20.6101		5621.13	5185.3	5521.36	5335.21		0.589134	0.582098	0.499648	0.574273
43343.9	44334	43055.4	46818.2		10282.4	10075	11393.4	10211.3		21.7948	21.9595	21.7464	22.3622		5966.18	6056.69	5939.67	6280.88		0.580232	0.60116	0.521326	0.615091
50277.6	43629.5	37668	34931		11170.6	9737.88	9213.46	8865.02		22.9	21.8426	20.7986	20.2822		6586.59	5992.36	5433.24	5166.76		0.589636	0.615365	0.589707	0.582825
40828	39965.6	35689	43240.8		9612.39	9365.8	8604.73	9706.67		21.3647	21.2132	20.4278	21.7775		5733.01	5651.99	5241.24	5956.71		0.596419	0.603471	0.609111	0.613672
45667.5	49411.1	44737.6	42952.4		10462.1	10469.6	10246.8	9740.23		22.1775	22.7677	22.026	21.729		6177.54	6510.69	6093.39	5930.2		0.590468	0.621866	0.594663	0.608835
46053.4	43166.7	44049.6	49063.6		10422	9793.47	10373.7	11065.2		22.2398	21.7651	21.9125	22.7142		6212.29	5949.9	6030.76	6480.13		0.596075	0.607538	0.581351	0.585631
45627.7	55089.7	40767.5	45719.6		10527.9	11606	9392.21	10364.3		22.1711	23.6084	21.3541	22.1859		6173.95	7000.42	5727.35	6182.24		0.586437	0.603173	0.609798	0.596493
42967.6	46847.2	36466.3	39644.2		10750.2	10456	9129.71	9273.28		21.7316	22.3669	20.5751	21.1562		5931.59	6283.47	5317.06	5621.65		0.551766	0.600944	0.582391	0.60622
43294.4	41950	51795	35201.6		10483.3	9648.67	11662.8	8583.12		21.7865	21.5586	23.1281	20.3344		5961.63	5837.57	6718.45	5193.41		0.568679	0.605013	0.576058	0.605072
46586.2	46253.9	40211.3	37711.9		10177.7	10395.5	9971.38	9386.24		22.3252	22.272	21.2566	20.8067		6260.11	6230.31	5675.13	5437.46		0.615081	0.599328	0.569142	0.579302
44667.7	44373.9	44476.7	45060.4		10161.1	9764.27	11044.9	9997.42		22.0145	21.9661	21.9831	22.0788		6087.04	6060.32	6069.68	6122.67		0.599054	0.620663	0.549546	0.612425
49894.5	43310.9	59024	46531.2		10680.9	9735.43	12340.6	10834.6		22.8417	21.7893	24.1576	22.3165		6553.09	5963.15	7329.87	6255.19		0.613533	0.61252	0.593964	0.577334
46840.3	53088.8	32956.2	41862		10294.5	10478.5	8231.66	9930.91		22.3658	23.3191	19.8925	21.5435		6282.86	6829.87	4970.14	5829.4		0.610312	0.651799	0.603784	0.586996
53889.4	40186.7	52691.7	39028.9		11576.3	10578.8	12203	9313.06		23.4357	21.2522	23.2608	21.0461		6898.37	5672.82	6795.77	5563.33		0.595904	0.536244	0.556894	0.597369
43543	45219.8	40108.3	41108.1		9945	9972.7	9260.62	9368.28		21.8281	22.1048	21.2384	21.4134		5984.43	6137.1	5665.44	5759.2		0.601753	0.61539	0.611777	0.614756
51834.9	53098.4	37978.3	11651		10408.9	10679.7	9694.82	4225.38		23.134	23.3205	20.8556	14.0658		6721.9	6830.7	5463.04	2484.96		0.645784	0.639596	0.563501	0.588103
58359.5	36551.6	10036	33804.9		11856.3	8837.82	3867.22	9412.01		24.0666	20.5911	13.3833	20.0618		7274.76	5325.35	2249.66	5055.11		0.613577	0.602564	0.581727	0.537091
42676.4	42866	37966	34623.4		9756.31	9746.4	9022.66	8378.81		21.6824	21.7144	20.8533	20.2225		5904.76	5922.24	5461.86	5136.38		0.605225	0.607634	0.605349	0.61302
48164.1	40385.8	38409.5	50133.4		10497.6	9534.4	9270.9	10848.7		22.5745	21.2873	20.9342	22.8781		6400.68	5691.54	5504.31	6573.99		0.609728	0.596948	0.593719	0.60597
46642.5	57221	43273.7	35286.7		10461.9	11692	10535.3	8705.57		22.3342	23.9091	21.783	20.3508		6265.16	7179.83	5959.73	5201.77		0.598855	0.614081	0.565692	0.597522
48232.8	35606.8	31054.2	35562.7		10346.8	9236.92	9710.83	9097.09		22.5852	20.4121	19.5022	20.4037		6406.77	5233.18	4777.03	5228.86		0.619203	0.566551	0.491928	0.574784
42451.2	40377.6	45627.5	58257.7		9845.28	9497.52	10166.1	11989		21.6441	21.2858	22.171	24.0526		5883.97	5690.77	6173.93	7266.29		0.597644	0.599185	0.607306	0.60608
48837	46941.9	43674.7	27783		10485.5	10463.5	9977.38	7908.82		22.6792	22.3819	21.8501	18.7919		6460.16	6291.94	5996.49	4435.37		0.616104	0.601323	0.601009	0.560813
46325.3	44080	39385.9	41765.9		10942.9	9511.13	9858.38	9454.05		22.2835	21.9175	21.1101	21.527		6236.72	6033.53	5597.21	5820.48		0.569933	0.634366	0.567761	0.61566
41673.9	42003.6	45189.5	33634.6		10198.7	9692.46	9821.94	8384.48		21.5112	21.5678	22.0999	20.0281		5811.93	5842.54	6134.36	5038.12		0.569869	0.602792	0.624557	0.600886
53222	9203.82	42569.2	42186.1		10708.8	3440.2	9344.33	9564.99		23.3386	13.0027	21.6642	21.599		6841.29	2123.52	5894.87	5859.45		0.638848	0.617266	0.63085	0.612594
53088.8	37135.2	42110.5	18926.7		10808.6	8657.61	9620.43	6125.44		23.3191	20.7001	21.5861	16.5349		6829.87	5381.89	5852.45	3433.95		0.631893	0.621637	0.608336	0.560605
39658	41702.8	39965.5	37544.4		9668.4	9550.83	9525.08	8860.78		21.1586	21.5162	21.2132	20.7759		5622.95	5814.61	5651.98	5421.35		0.581581	0.608807	0.593379	0.611837
40855.5	32342.4	21739.2	39859.8		9954.51	8810.5	6917.41	9275.45		21.3695	19.7682	17.3164	21.1945		5735.59	4908.24	3766.23	5642.01		0.57618	0.55709	0.544456	0.608274
39611.3	38677.4	44945	41943.1		8841.72	9609.81	10036.9	10016.4		21.1503	20.9828	22.0599	21.5574		5618.54	5529.88	6112.21	5836.93		0.635458	0.575441	0.608974	0.582737
41855.2	45346.2	34737.4	29400.8		9953.8	10303.3	8787.47	7948.29		21.5424	22.1254	20.2446	19.1498		5828.77	6148.53	5147.65	4605.92		0.585582	0.596753	0.585794	0.579486
40741.5	47297.6	34223.7	41422.6		9492.15	10160.7	8440.16	9290.87		21.3496	22.4383	20.1443	21.4679		5724.91	6323.68	5096.77	5788.54		0.603121	0.622367	0.603872	0.623035
41514.6	33825.6	38950.6	48793		9879.06	8206.25	9228.99	10253.6		21.4838	20.0659	21.0321	22.6723		5797.11	5057.17	5555.89	6456.28		0.586808	0.616259	0.602004	0.62966
39480.8	39133.4	39402.4	40789.5		9766.05	9732.16	9095.38	9351.6		21.1271	21.0649	21.1131	21.358		5606.19	5573.26	5598.77	5729.41		0.574049	0.572664	0.615562	0.612666
36997.9	40020.5	39715.5	48662.6		8929.72	9793.61	9159.3	11253.6		20.6746	21.2229	21.1688	22.6521		5368.61	5657.17	5628.39	6444.77		0.601207	0.577639	0.6145	0.572685
46374.7	79218.5	40573.8	35792.1		10190.3	16214.6	9683.69	9128.84		22.2914	26.6473	21.3203	20.4475		6241.15	8918.57	5709.19	5251.32		0.61246	0.550033	0.589568	0.575246
37665.3	40189.4	32542.8	46501		9273.98	8939.06	8502.31	10300.8		20.7981	21.2527	19.809	22.3116		5432.98	5673.07	4928.49	6252.48		0.585831	0.634639	0.579665	0.60699
39075.7	44386.2	43559.4	37235.4		9003.82	10659.8	10327.9	8914.3		21.0546	21.9681	21.8309	20.7187		5567.78	6061.44	5985.93	5391.56		0.61838	0.568626	0.579589	0.604822
39642.8	31407.2	39512.3	46358.2		8934.14	7758.36	9782.59	10167.2		21.1559	19.5758	21.1327	22.2888		5621.52	4813.16	5609.17	6239.67		0.629218	0.620384	0.573383	0.613706
34166.2	44235.2	34414.6	37246.4		8333.24	9736.64	8248.26	8525.55		20.133	21.9432	20.1817	20.7207		5091.06	6047.69	5115.71	5392.63		0.610934	0.621127	0.620217	0.632525
28651	30307.2	36585.8	45129.1		7148.91	7622.85	8309.86	10285		18.9856	19.3446	20.5975	22.09		4527.28	4700.11	5328.67	6128.89		0.633282	0.616582	0.641247	0.595906
46142.6	43175	28583.6	29292.3		10809.7	10409.4	7499.9	8125.62		22.2542	21.7665	18.9707	19.1262		6220.31	5950.67	4520.18	4594.59		0.575438	0.571663	0.602698	0.565444
39388.8	44286	38662.2	32367.1		9093.46	9779.85	9496.61	8194.86		21.1106	21.9516	20.98	19.7733		5597.48	6052.32	5528.43	4910.74		0.61555	0.618856	0.582148	0.599246
37111.9	45666.1	31692.8	37666.6		9026.99	10001.5	7633.45	9003.3		20.6958	22.1773	19.635	20.7984		5379.64	6177.41	4842.29	5433.11		0.59595	0.617649	0.634352	0.603457
40689.3	24040.9	34708.5	33475.3		9466.5	6859.36	8539.03	8223.31		21.3405	17.9072	20.239	19.9964		5720.02	4027.58	5144.79	5022.2		0.604238	0.587166	0.602503	0.610727
41539.4	48717.6	42846.6	46396.6		9369.39	11299.8	9626.59	10490.3		21.4881	22.6607	21.7111	22.2949		5799.42	6449.63	5920.45	6243.12		0.618975	0.570774	0.61501	0.595132
33151.3	38065	35131.5	35249.6		7804	8968.38	8606.07	8868.4		19.9317	20.8714	20.3209	20.3436		4989.74	5471.35	5186.51	5198.13		0.639382	0.610071	0.602657	0.58614
35882.8	35260.7	36699.8	36179.3		8585.7	8692.76	9075.98	9004.47		20.4647	20.3458	20.6189	20.5209		5260.19	5199.22	5339.74	5289.13		0.612669	0.598109	0.588337	0.587389
33544.1	41141.1	34832.1	34946.1		8418.48	9567.36	8503.67	8530.84		20.0101	21.4192	20.263	20.2851		5029.08	5762.28	5157	5168.25		0.597385	0.602286	0.606444	0.605831
37128.3	39056.5	22333.8	35031.3		8868.25	9349.55	6272.87	8304.41		20.6988	21.0511	17.4729	20.3016		5381.22	5565.95	3834.59	5176.64		0.606796	0.595318	0.611298	0.623361
35207.1	30878.5	27914.9	42716.2		8657.7	7938.25	7472.13	9529.54		20.3355	19.4654	18.8216	21.6891		5193.95	4758.99	4449.4	5908.43		0.599922	0.599501	0.595466	0.620013
34244.4	40553.4	33096.3	34624.8		8395.39	9085.38	8459.76	8504.99		20.1484	21.3167	19.9207	20.2227		5098.83	5707.28	4984.22	5136.52		0.607337	0.628182	0.589168	0.603942
31326.2	35119.2	32132.2	29790.8		7615.3	8377.79	8205.98	7693.51		19.559	20.3185	19.7253	19.2341		4804.88	5185.3	4886.95	4646.57		0.630951	0.618934	0.595535	0.603959
29694.7	37798.5	25205.4	27095		7194.74	9250.86	7149.47	7164.03		19.2134	20.8226	18.1918	18.6355		4636.57	5445.78	4156.61	4361.84		0.644439	0.588679	0.581388	0.608853
30945.8	27739.2	31334.3	32249		8252.78	7241.85	7469.43	8512.94		19.4795	18.782	19.5607	19.7492		4765.9	4430.71	4805.71	4898.78		0.577491	0.61182	0.643384	0.575451
25502	42242.5	28454.6	32038.9		6735.54	9134.87	7245.77	7931.74		18.2629	21.6086	18.9421	19.7062		4189.16	5864.67	4506.57	4877.48		0.621949	0.642009	0.621958	0.614932
18323.8	37110.5	19738.3	38261.3		5605.63	8509.56	5670.6	8870.63		16.3575	20.6955	16.768	20.9073		3360.63	5379.5	3531.43	5490.15		0.59951	0.632171	0.622761	0.618913
26391.9	34288.4	22398.3	26856.1		6781.63	8768.87	6360.02	7494.1		18.4729	20.157	17.4897	18.5805		4286.06	5103.2	3841.97	4336.17		0.63201	0.581967	0.604082	0.578611
18766	43209.3	22912	26374.1		5533.81	9607.77	6406.06	7036.71		16.488	21.7722	17.6224	18.4687		3414.48	5953.82	3900.49	4284.13		0.617022	0.619688	0.608875	0.608825
20898.8	36669.7	19278.2	29907.5		5807.54	8630.2	5511.8	7694.26		17.0904	20.6132	16.6367	19.2592		3668.53	5336.82	3476.34	4658.69		0.631683	0.618389	0.630708	0.605476
17017.8	31227.3	14566.5	30562.6		5492.41	7976.36	4786.75	7579.79		15.9592	19.5384	15.1529	19.3988		3198.99	4794.76	2883.9	4726.48		0.582438	0.601121	0.602477	0.623563
19492.5	31166.9	18226.3	21924.6		5522.79	8170.37	5760.02	6490.11		16.6981	19.5258	16.3284	17.3655		3502.05	4788.58	3348.7	3787.61		0.634109	0.586091	0.58137	0.583597
17019.2	41197.4	17837.7	32623.9		5494.92	9671.38	5083.67	7969.18		15.9597	21.4289	16.2115	19.8254		3199.17	5767.54	3300.93	4936.68		0.582204	0.596351	0.649321	0.619471
19531	33041.4	14304.2	26694		5348.8	8606.2	4938.78	7377.03		16.7091	19.9096	15.0614	18.5431		3506.66	4978.7	2849.18	4318.7		0.655598	0.578502	0.576899	0.585425
15824.5	34225.2	14581.6	28554.8		4934.77	7902.8	4631.39	7845.88		15.5771	20.1446	15.1581	18.9643		3047.64	5096.92	2885.9	4517.14		0.617586	0.644951	0.623117	0.575734
15722.8	40116.7	15275.1	22188.3		5157.36	9058.54	4685.83	6306.29		15.5437	21.2399	15.3947	17.4349		3034.57	5666.23	2976.69	3817.92		0.588396	0.625512	0.635253	0.605414
17199.1	33876.4	7689.05	24407.5		5062.15	7771.93	3075.93	6961.08		16.0157	20.076	12.2462	17.9978		3221.67	5062.23	1883.62	4068.42		0.636423	0.651348	0.612373	0.584453
34245.8	19768.6	16403.9	30480.2		8588.77	5564.45	5312.27	8246		20.1487	16.7765	15.765	19.3813		5098.97	3535.04	3121.59	4717.98		0.593678	0.635291	0.587618	0.572154
33419.1	35035.5	26367.2	30761.7		8571.14	8205.23	6807.06	8328.56		19.9852	20.3024	18.4671	19.4408		5016.57	5177.06	4283.38	4746.98		0.585287	0.630946	0.629256	0.569964
33725.3	18538.1	14293.2	28366.7		8534.64	5480.38	5305.64	7200.05		20.0461	16.421	15.0575	18.9226		5047.17	3386.78	2847.72	4497.28		0.591375	0.617983	0.536734	0.624618
41056	14905.7	18281.2	29582.1		9388.57	4930.23	5425.34	7518.36		21.4044	15.2696	16.3448	19.1891		5754.33	2928.5	3355.42	4624.84		0.612909	0.593989	0.618472	0.615139
4628	21332.7	15456.4	27453.5		2543.09	5778.5	4899.52	7140.34		10.3397	17.2078	15.4554	18.7173		1342.78	3719.13	3000.2	4400.23		0.528013	0.643615	0.612345	0.61625
33664.9	20260.2	16748.6	18008		8838.9	5739.3	5697.62	5645.83		20.0341	16.9145	15.8746	16.2629		5041.14	3593.41	3165.17	3321.91		0.570336	0.626106	0.555524	0.588383
35818.2	15512.7	13101.2	20565		9158.63	4779.52	4440.62	5865.11		20.4524	15.4741	14.6267	16.9989		5253.88	3007.48	2687.11	3629.36		0.573653	0.629242	0.60512	0.618805
38150.1	16082.6	7469.32	18874.5		9629.81	4626.27	3003.41	5610.32		20.887	15.6614	12.1284	16.5197		5479.5	3080.69	1847.56	3427.63		0.569015	0.665913	0.615153	0.610951
27369.7	13245.4	11475.2	20414		7815.93	4320.41	4039.91	5908.67		18.6982	14.6802	13.9947	16.9572		4391.28	2706.79	2459.9	3611.57		0.561837	0.626512	0.6089	0.611232
32404.2	16717.1	14904.3	18170		8282.52	5105.89	5029.58	5497.72		19.7808	15.8647	15.2691	16.3116		4914.49	3161.2	2928.32	3341.8		0.593357	0.619127	0.582219	0.607852
26327.4	14524	15773.6	17196.3		7000.5	4620.68	5111.01	5235.75		18.4578	15.1381	15.5604	16.0148		4279.07	2878.29	3041.1	3221.32		0.611252	0.622915	0.59501	0.615255
26560.9	15613	9667.96	14687.3		7183.38	4854.06	3747.9	4464.34		18.5122	15.5074	13.2177	15.1947		4304.33	3020.43	2194.32	2899.83		0.599207	0.622247	0.585481	0.649553
16956	19081.7	10814.7	21275		5144.36	5498.01	3651.26	5952.56		15.9399	16.5799	13.7209	17.1923		3191.24	3452.67	2364.58	3712.42		0.620338	0.627986	0.647606	0.623668
18948.7	27719.7	14897.4	15994.7		5924.86	7642.44	4608.94	5283.33		16.5413	18.7776	15.2668	15.6328		3436.61	4428.63	2927.42	3069.46		0.580032	0.579479	0.63516	0.58097
20457.9	15298.3	9474.32	21258.5		6079.04	4857.81	3732.81	6170.36		16.9693	15.4025	13.1288	17.1878		3616.75	2979.7	2164.92	3710.5		0.594954	0.613384	0.579972	0.601343
20140.7	18123.2	10566.1	18893.7		6180.02	5541.86	4119.54	5832.92		16.8812	16.2975	13.6149	16.5253		3579.26	3336.06	2328.2	3429.96		0.579167	0.601975	0.565161	0.588034
12827.9	26283.2	14400.3	21119.8		4805.23	7180.17	4416.33	6265.12		14.5243	18.4475	15.095	17.1504		2649.6	4274.28	2861.93	3694.34		0.5514	0.595289	0.648033	0.589668
18900.6	16450.5	14150.4	12891.1		5752.41	5009.51	4901.52	4594.13		16.5273	15.7799	15.0072	14.5481		3430.79	3127.5	2828.72	2658.3		0.59641	0.624312	0.577111	0.57863
16945.1	15400	11710	15043		5533.69	5187.59	4371.82	4948.74		15.9365	15.4366	14.0895	15.3164		3189.87	2992.89	2493.34	2946.46		0.576446	0.576933	0.570321	0.595396
13927.9	13447.2	5686.79	13132.8		4800.44	4819.77	2709.2	4589.54		14.9281	14.7544	11.0747	14.6385		2798.99	2734.21	1540.48	2691.42		0.583069	0.567291	0.56861	0.586426
16136.2	16234.9	11971	11935.3		5441.22	4958.62	4291.14	4478.81		15.6787	15.7106	14.1934	14.1793		3087.53	3100.11	2530.26	2525.22		0.567434	0.625196	0.589646	0.563815
16235.1	16303.6	9786.06	7598.42		5046.74	5310.16	3790.17	3126.95		15.7107	15.7328	13.2713	12.1979		3100.14	3108.85	2212.16	1868.79		0.614285	0.585453	0.583656	0.597639
16652.6	12617.7	8941.49	9688.56		5345.11	4272.01	3628.17	3784.79		15.8442	14.4445	12.878	13.2271		3153.06	2620.58	2082.97	2197.44		0.589896	0.61343	0.574112	0.580597
15887.6	13478.8	8202.66	15194.1		4835.2	4386.88	3246.53	5279.05		15.5978	14.7659	12.513	15.3675		3055.74	2738.49	1966.59	2966.16		0.631978	0.624246	0.605751	0.561873
10996	13160.1	8173.82	11399.7		3940.36	4339.2	3229.77	3885.36		13.7971	14.6486	12.4983	13.964		2390.93	2695.15	1961.98	2449.1		0.60678	0.621118	0.607467	0.63034
12558.8	10914.8	5118.25	6120.76		4319.15	3886.64	2317.66	2688.27		14.422	13.7631	10.6926	11.3496		2612.42	2379.15	1436.01	1617.88		0.604846	0.612135	0.619596	0.601831
11266.5	5754.05	6656.33	8664.09		3774.6	2639	2815.37	3417.27		13.9094	11.1182	11.6714	12.7434		2429.98	1552.6	1710.94	2039.67		0.643773	0.588329	0.607713	0.59687
9956.38	8033.69	3749.08	7485.81		3696.1	3400.78	1727.63	3318.16		13.3478	12.4265	9.63871	12.1373		2237.75	1939.49	1166.88	1850.28		0.605436	0.570307	0.675424	0.557621
11435.4	9416.59	4378.05	8529.51		3886.35	3669.2	2083	3310.59		13.9785	13.1021	10.1501	12.6771		2454.21	2156.12	1293.99	2018.49		0.631495	0.587627	0.621215	0.609707
8735.52	31574.5	5789.79	2599.64		3261.36	8469.18	2622.46	1614.74		12.7783	19.6105	11.1412	8.53129		2050.86	4830.24	1559.02	914.154		0.628837	0.570331	0.594489	0.566131
5309.15	10850.3	5582.42	2668.3		2207.21	4111.83	2396.67	1557.07		10.8239	13.7359	11.0066	8.60575		1471.5	2369.76	1521.57	930.18		0.666679	0.576328	0.634869	0.597391
9479.84	34752.6	3147.58	3506.01		3638.15	8649.18	1539.88	2071.79		13.1314	20.2476	9.09291	9.42573		2165.77	5149.15	1038.47	1115.89		0.595293	0.595334	0.674386	0.538609
10518	29635.7	2044.83	2590.03		3798.57	8335.51	1149.28	1515.45		13.5942	19.2006	7.87522	8.52077		2321.13	4630.42	778.961	911.9		0.611054	0.555506	0.677781	0.601736
7185.07	32909.6	1899.26	6373.44		3016.66	8524.25	1134.22	2641.91		11.9726	19.8831	7.68373	11.5036		1800.38	4965.46	741.538	1662.11		0.596813	0.582509	0.653787	0.629132
3966.07	34633.1	7283.93	2986.91		2130.15	8791.57	3050.17	1687.34		9.82119	20.2243	12.0272	8.93548		1211.48	5137.34	1816.86	1002.83		0.568732	0.584348	0.595658	0.594323
6812.91	26389.2	7373.19	6785.43		2895.53	7754.71	2848.38	2691.22		11.7622	18.4722	12.0762	11.7464		1737.66	4285.76	1831.67	1732.99		0.60012	0.552666	0.643057	0.643942
4894.42	26249.1	1995.39	2715		2247.31	7321.51	1252.37	1471.74		10.5344	18.4395	7.81124	8.65567		1393.84	4270.58	766.354	941.002		0.620224	0.583292	0.611923	0.639381
4244.85	5398.42	26091.1	5918.88		2227.55	2556.94	8251	2539.43		10.0461	10.8843	18.4024	11.2234		1267.61	1487.95	4253.43	1582.11		0.56906	0.581926	0.515504	0.623018
3219	30724.7	35020.3	11911.9		1757.05	8088.51	9916.74	4314.86		9.16117	19.433	20.2994	14.17		1054.12	4743.18	5175.56	2521.92		0.599939	0.586409	0.521901	0.584473
7360.85	37068	25832.9	5462.95		3012.82	8924.4	7657.04	2462.17		12.0694	20.6876	18.3415	10.9275		1829.63	5375.39	4225.32	1499.78		0.607281	0.602325	0.551821	0.609131
4272.31	6709.92	11379.1	6444.85		1876.83	2897.81	3832.1	2677.26		10.0677	11.7026	13.9555	11.5464		1273.07	1720.11	2446.15	1674.5		0.678309	0.593589	0.638331	0.625454
5218.51	9187.34	25319.3	5188.29		2179.47	3527.63	7923.72	2373.1		10.762	12.9949	18.2191	10.7412		1454.71	2120.98	4169.13	1449.08		0.667458	0.601249	0.526158	0.610629
1300.51	7910.18	33373.7	3534.85		911.243	3099.32	8960.2	1945.88		6.77249	12.3625	19.9762	9.4515		576.085	1919.56	5012.03	1122		0.632197	0.619349	0.559366	0.576601
1402.13	9021.17	24886.7	1906.13		909.208	3325.05	6792.29	1210.42		6.94448	12.9161	18.1148	7.69298		605.717	2095.33	4121.5	743.326		0.666203	0.630165	0.606791	0.614105
1531.22	4498.91	19366.1	1485.9		1047.28	2078.92	5956.87	1004.76		7.15138	10.2427	16.6619	7.08012		642.346	1317.7	3486.89	629.608		0.613347	0.633837	0.585357	0.626626
27051.1	4121.26	2296.14	1395.26		7724.92	1887.95	1477.57	950.925		18.6254	9.94765	8.18546	6.93312		4357.13	1242.88	841.543	603.737		0.564036	0.658325	0.569545	0.634894
38573.1	3044.59	3337.09	68487.4		11104.6	1630.13	1920.45	15606.4		20.9639	8.99263	9.27185	25.3852		5519.93	1015.69	1079.75	8093.78		0.497085	0.623076	0.562237	0.518619
28640	4239.36	2515.87	23991.4		8842.41	1968.22	1384.89	7145.53		18.9831	10.0418	8.43866	17.8949		4526.12	1266.52	894.409	4022.05		0.511865	0.643483	0.645834	0.562877
33493.2	1306	4273.68	20911.1		8914.04	976.406	2091.25	6465.31		20	6.78201	10.0688	17.0937		5023.99	577.705	1273.34	3669.97		0.563604	0.591665	0.608891	0.56764
25547.4	2601.02				7206.95	1432.68				18.2737	8.5328				4194.13	914.478				0.581956	0.638299
42833	11281.6				9953.42	4413.87				21.7088	13.9156				5919.2	2432.15				0.59469	0.551025
30941.7					8225.64					19.4786					4765.48					0.579345
26354.9					8427.76					18.4642					4282.05					0.508089
39907.9					10186.2					21.203					5646.55					0.554333

## Sheet: figure 1L spzl
Vp						SAp						radius						SAs						sphericity
spzl 1	spzl 2	spzl 3	spzl 4	spzl 5		spzl 1	spzl 2	spzl 3	spzl 4	spzl 5		spzl 1	spzl 2	spzl 3	spzl 4	spzl 5		spzl 1	spzl 2	spzl 3	spzl 4	spzl 5		spzl 1	spzl 2	spzl 3	spzl 4	spzl 5
14930.5	44343.7	6826.64	5064.69	44649.7		5103.41	9919.39	3132.75	2673.2	9455.34		15.2781	21.9611	11.7701	10.6552	22.0115		2931.75	6057.57	1740	1425.98	6085.41		0.574469	0.61068	0.555422	0.533435	0.643595
24165.9	51620.8	11169	9411.15	33912		6458.04	10678.5	4352.6	4391.97	7940.11		17.9382	23.1021	13.8691	13.0996	20.083		4041.53	6703.38	2415.94	2155.29	5065.78		0.625814	0.627746	0.555058	0.490734	0.637999
44765.4	43089.9	19910	22590.6	33219.8		10034.7	9832.71	5934.46	6660.49	7928.86		22.0305	21.7522	16.8164	17.5396	19.9454		6095.92	5942.84	3551.88	3863.93	4996.61		0.607484	0.604395	0.598518	0.580127	0.63018
27599.2	40716.8	7353.99	47189	28704.5		7284.33	9723.18	3093.19	10682.3	7143.62		18.7503	21.3453	12.0657	22.4211	18.9974		4415.79	5722.6	1828.49	6314	4532.91		0.606204	0.588552	0.591134	0.591071	0.63454
35063	12534.1	15041.7	29205.7	22828.2		8108.6	4918.84	5133.62	7481.87	6879.51		20.3077	14.4126	15.3159	19.1073	17.6009		5179.77	2608.99	2946.29	4585.53	3890.98		0.638799	0.530408	0.57392	0.612885	0.565589
14653.1	4743.36	28829.6	16512.4	37923.3		5435	2497.43	7668.24	5935.48	8716		15.1829	10.4249	19.0249	15.7996	20.8455		2895.32	1365.01	4546.07	3135.34	5457.76		0.532718	0.546565	0.592844	0.528236	0.626178
11940.8	29319.9	10935.5	15899.9	45096		4488.04	8523.14	4543.09	5504.51	9261.66		14.1815	19.1322	13.7718	15.6018	22.0846		2526	4597.47	2382.15	3057.32	6125.89		0.562829	0.539411	0.524347	0.55542	0.661425
62012.6	13047.7	7360.85	53367.4	36706.6		11447	4633.5	3464.95	10973.3	8538.04		24.5586	14.6068	12.0694	23.3598	20.6202		7575.26	2679.79	1829.63	6853.75	5340.4		0.661768	0.57835	0.528039	0.624584	0.625483
10143.2	18328	5939.5	50570	39635.8		4762.79	6516.92	2760.77	10819.9	8852.86		13.4308	16.3587	11.2364	22.9443	21.1547		2265.66	3361.15	1585.78	6612.1	5620.86		0.475699	0.515757	0.574399	0.611105	0.63492
61180.4	7380.09	19926.5	31427.7	39089.3		11359.9	3124.84	6017.14	8138.55	8816.79		24.4483	12.0799	16.8211	19.5801	21.057		7507.33	1832.81	3553.84	4815.25	5569.07		0.660862	0.586531	0.59062	0.59166	0.631644
10699.4	8224.67	37931.8	39579.6	44895.5		4678.27	3578.08	8579.18	9946.34	9316.42		13.6719	12.5242	20.8471	21.1447	22.0518		2347.74	1970.11	5458.58	5615.54	6107.72		0.50184	0.550604	0.636259	0.564584	0.655587
52645.4	54585.7	35220.9	7936.24	40998.1		10561.7	11277.2	8946.48	3712.99	9535.84		23.254	23.5362	20.3381	12.3761	21.3943		6791.79	6957.66	5195.3	1923.77	5748.92		0.643059	0.616967	0.580709	0.51812	0.602875
27198.2	17495.8	37360.5	49746	27483.6		7352.7	5660.61	9001.33	11020.7	7566.78		18.6591	16.1073	20.7419	22.819	18.7241		4372.91	3258.62	5403.63	6540.08	4403.45		0.594736	0.575665	0.600315	0.593436	0.581945
31224.7	13904.6	22723.9	35621.8	41496.6		8300.22	5088.42	6671.23	9093.49	8945.58		19.5378	14.9198	17.574	20.415	21.4807		4794.5	2795.87	3879.11	5234.65	5795.43		0.577635	0.549457	0.581469	0.575648	0.647854
48823.5	50106.1	10996	22519.2	35830.4		10376.4	10936.3	3900.41	6776.31	8582.32		22.6771	22.8739	13.7971	17.5211	20.4548		6458.97	6571.6	2390.93	3855.78	5255.07		0.622467	0.600898	0.612995	0.569009	0.612313
27207.8	18166	6639.88	13802.9	40369.2		7388.93	6016.48	2945.34	4752.17	8851.55		18.6613	16.3104	11.6618	14.8833	21.2844		4373.94	3341.31	1708.12	2782.22	5689.98		0.591959	0.55536	0.579939	0.585462	0.642823
28925.8	14581.7	30112.2	38397.2	37460.5		7464.93	5212.16	7772.36	9872.75	8821.28		19.0461	15.1582	19.303	20.932	20.7604		4556.18	2885.91	4679.93	5503.14	5413.27		0.610345	0.553688	0.602124	0.557407	0.61366
40495.8	33778.9	32692.6	51757.9	44178.7		8927.93	8333.31	8757.61	10692.4	9523.52		21.3066	20.0567	19.8393	23.1226	21.9338		5701.87	5052.52	4943.6	6715.24	6042.54		0.638655	0.606304	0.564492	0.628039	0.634486
42970.5	10721.3	13927.9	57584.8	14072.1		9268.57	4387.47	5172.64	11418.6	4836.84		21.732	13.6813	14.9281	23.9596	14.9795		5931.86	2350.94	2798.99	7210.23	2818.27		0.639997	0.535831	0.541114	0.631446	0.582669
54017.3	21092.4	41181	11501.3	43390.4		10342.2	6406.86	9515.91	4711.79	9405.45		23.4542	17.143	21.4261	14.0053	21.8026		6909.28	3691.15	5766.01	2463.63	5970.44		0.668067	0.576124	0.605934	0.522865	0.634785
28655.2	50042.9	12810.1	53338.6	30787.7		7281.09	11061.1	4804.31	11803.9	7772.77		18.9865	22.8643	14.5176	23.3556	19.4463		4527.72	6566.07	2647.15	6851.28	4749.66		0.621847	0.593618	0.550995	0.580425	0.611064
25834.5	29498.4	44954.8	40532.6	37772.3		7056.93	8079.01	10059.4	9421.72	8464.75		18.3419	19.1709	22.0615	21.313	20.8178		4225.49	4616.11	6113.1	5705.32	5443.27		0.598772	0.571371	0.6077	0.60555	0.643051
38959.1	35888.3	33568.8	14698.3	16656.6		8517.78	8806.47	8763.46	5285.99	5532.49		21.0336	20.4658	20.015	15.1985	15.8455		5556.7	5260.73	5031.54	2901.27	3153.56		0.652364	0.597371	0.57415	0.548861	0.570008
33151.4	9700.96	48333.1	27078.5	12402.2		8312.85	4094.65	10734.7	7740.46	4416.37		19.9317	13.2327	22.6009	18.6317	14.3618		4989.75	2199.31	6415.65	4360.07	2590.66		0.600245	0.537119	0.597655	0.563283	0.586603
29951.6	31510.3	22423.1	17310.3	7279.8		7451.48	8046.69	6544.37	5820.43	3471.15		19.2686	19.5972	17.4961	16.0501	12.025		4663.27	4823.69	3844.81	3235.54	1816.17		0.625818	0.599462	0.587498	0.555894	0.523219
26326.1	66168.1	17285.7	15895.8	21645.8		7380.05	12347.8	5483.78	5538.6	6250.42		18.4575	25.0954	16.0425	15.6005	17.2916		4278.93	7910	3232.48	3056.79	3755.43		0.579797	0.6406	0.589461	0.551907	0.600829
26114.6	11756.8	34975	11406.5	35540.7		7211.67	4391.4	9190.9	4408.1	8783.81		18.4079	14.1083	20.2907	13.9667	20.3995		4255.98	2499.98	5171.1	2450.07	5226.71		0.590152	0.56929	0.562632	0.555812	0.595039
41418.7	11748.5	13731.6	13447.2	27636		9214.43	4287.03	4887.17	4771.59	7258		21.4672	14.1049	14.8577	14.7544	18.7587		5788.18	2498.8	2772.63	2734.21	4419.71		0.628164	0.582876	0.567328	0.573019	0.608944
28634.6	12734.6	25470.5	62810.1	10314.8		7163.46	4680.89	7451.84	12222.8	4267.34		18.982	14.489	18.2553	24.6634	13.5061		4525.55	2636.74	4185.71	7640.06	2291.14		0.631755	0.563299	0.561701	0.625067	0.536901
23211.5	30679.4	32846.4	23590.4	14344		6046.53	7790.34	8213.61	6853.97	4835.87		17.6988	19.4234	19.8704	17.7946	15.0753		3934.41	4738.51	4959.1	3977.11	2854.46		0.650689	0.608255	0.603766	0.580264	0.590269
25389.5	19587.3	21634.9	41588.7	7077.92		6667.35	6022.1	6622.91	9908.26	3324.08		18.236	16.7251	17.2887	21.4966	11.9128		4176.83	3513.4	3754.17	5804	1782.44		0.62646	0.583417	0.566846	0.585774	0.53622
17965.5	7260.61	25389.5	20565	28465.5		5634.91	3430.61	7304.17	6417.43	6838.56		16.2501	12.0144	18.236	16.9989	18.9445		3316.68	1812.98	4176.83	3629.36	4507.72		0.588595	0.528471	0.571842	0.565547	0.659162
7962.38	35256.6	26831.4	43593.7	9284.8		3455.06	8781.3	7913.3	10010.5	3614.09		12.3896	20.345	18.5748	21.8366	13.0407		1928	5198.81	4333.51	5989.08	2135.96		0.558021	0.592032	0.547623	0.598279	0.591008
23341.9	13345.7	12940.5	12685.1	5798.02		6839.59	4746.98	4494.15	4484.23	2751.39		17.7319	14.7172	14.5667	14.4702	11.1465		3949.13	2720.43	2665.09	2629.9	1560.5		0.577393	0.573087	0.593013	0.586479	0.567168
14863.2	39056.5	40733.3	11965.5	7991.16		5438.6	9535.88	9624.79	4333.22	3211.52		15.2551	21.0511	21.3482	14.1913	12.4045		2922.93	5565.95	5724.14	2529.48	1932.64		0.537442	0.583685	0.594729	0.583741	0.601783
29781.3	10920.4	19315.4	16780.2	5218.49		7868.19	4227.19	6659.79	5063.96	2573.89		19.232	13.7654	16.6473	15.8846	10.762		4645.58	2379.96	3480.81	3169.15	1454.7		0.590425	0.563012	0.52266	0.625824	0.565176
22441.1	15758.6	18551.8	33237.7	21942.4		6559.41	4892.54	5638.38	8314.38	6302.02		17.5008	15.5555	16.425	19.949	17.3702		3846.86	3039.18	3388.45	4998.4	3789.66		0.586465	0.621186	0.600962	0.601176	0.60134
17379.1	16888.8	42260.4	37242.2	35040.8		5698.87	5625.01	9414.85	9311.78	8040.59		16.0714	15.9188	21.6117	20.72	20.3034		3244.11	3182.8	5866.33	5392.22	5177.58		0.569255	0.565831	0.623093	0.579075	0.64393
15176.3	18079.4	6453.11	11519.2	25734		5549.16	5920.15	2934.38	4610.2	6340.92		15.3615	16.2844	11.5514	14.0126	18.3181		2963.84	3330.68	1675.93	2466.18	4214.53		0.534106	0.562601	0.571137	0.534941	0.664656
8732.8	14345.4	9585.59	27426	8809.64		3931.22	4735.31	3672.39	7510.25	3712.82		12.777	15.0758	13.18	18.711	12.8144		2050.44	2854.65	2181.84	4397.3	2062.45		0.521578	0.602843	0.59412	0.585506	0.555493
4817.53	28000.1	16751.4	11255.5	6424.24		2545.36	7972.92	5048.41	4187.97	2747.37		10.479	18.8407	15.8755	13.9048	11.5341		1379.2	4458.45	3165.52	2428.4	1670.93		0.541848	0.559199	0.627033	0.579852	0.608193
22566	9960.51	7933.52	21876.5	8919.5		6096.57	3833.09	3624.28	6727.97	3744.63		17.5332	13.3497	12.3746	17.3528	12.8674		3861.12	2238.37	1923.33	3782.07	2079.56		0.633327	0.58396	0.53068	0.562141	0.555344
9724.32	13031.2	17806.1	20610.3	10117		4169.98	4759.25	5537.74	6093.29	3896.63		13.2433	14.6006	16.2019	17.0113	13.4192		2202.84	2677.53	3297.03	3634.69	2261.75		0.528262	0.562594	0.595375	0.596506	0.580438
8903.09	26028.1	13882.6	9853.35	17144.1		3761.9	7109.56	4976.27	3662.86	5395.54		12.8595	18.3876	14.9119	13.3016	15.9986		2077.01	4246.58	2792.92	2222.29	3214.8		0.552116	0.597305	0.561247	0.606708	0.595825
19999.3	36461	7134.26	32479.7	29784.9		5785.09	8484.9	2971.64	8978.66	7015.78		16.8416	20.5741	11.9443	19.7962	19.2328		3562.49	5316.55	1791.88	4922.12	4645.95		0.615806	0.626589	0.602995	0.548202	0.662215
7654.76	17520.5	19511.8	26489.4	7198.7		3299.73	5570.6	6632.24	7227.3	2761.71		12.228	16.1148	16.7036	18.4956	11.9801		1878.01	3261.68	3504.36	4296.61	1802.66		0.569141	0.585517	0.528383	0.594497	0.652733
6731.9	11511	4795.54	11814.4	7050.39		3369.95	4135.64	2567.22	4416.92	2939.05		11.7154	14.0093	10.463	14.1313	11.8973		1723.86	2465.01	1375	2508.14	1777.81		0.511539	0.596042	0.535598	0.567848	0.604894
16170.6	30893.7	7319.66	14344	4673.25		4898.8	7677.68	3338.57	4958.23	2330.62		15.6899	19.4686	12.0469	15.0753	10.3733		3091.92	4760.55	1822.8	2854.46	1351.52		0.631158	0.620051	0.545981	0.575702	0.579898
14260.3	26641.9	12369.3	17587.7	4172		5085.7	7648.08	4254.83	5775.78	2133.96		15.046	18.531	14.3491	16.1354	9.98831		2843.35	4313.08	2586.07	3270.02	1253.06		0.559087	0.563943	0.607797	0.56616	0.587202
8463.63	29240.2	7922.53	19908.6	15938.2		3519.81	7406.12	3166.13	6193.48	4715.48		12.6443	19.1148	12.3689	16.8161	15.6143		2008.08	4589.14	1921.56	3551.71	3062.22		0.570509	0.619641	0.60691	0.57346	0.649398
4297.05	9430.42	24823.7	12620.5	4791.35		2452.27	3588.85	7158.79	4494.54	2313.94		10.0871	13.1085	18.0995	14.4456	10.46		1277.98	2158.23	4114.54	2620.97	1374.2		0.521142	0.601371	0.574754	0.583145	0.593878
5355.86	22342.1	10424.7	32677.4	20715.8		2599.63	6480.74	3797.58	8290.96	5619.8		10.8556	17.4751	13.5539	19.8363	17.0403		1480.12	3835.54	2307.38	4942.07	3647.08		0.569358	0.591837	0.607593	0.59608	0.64897
7131.53	32746.2	12069.9	9461.96	7818.05		2935.82	8290.01	4136.7	3859.64	3132.35		11.9428	19.8502	14.2324	13.1231	12.3143		1791.43	4949.01	2544.17	2163.04	1904.63		0.610197	0.596984	0.615025	0.560426	0.60805
5174.58	12539.6	15000.5	9250.48	3787.49		2713.04	4746	4705.84	3820.07	1982		10.7317	14.4147	15.3019	13.0246	9.67151		1446.53	2609.76	2940.91	2130.69	1174.84		0.533177	0.549885	0.624948	0.557762	0.592754
10626.6	24763.3	11348.9	11385.9	7767.23		3797.52	6564.25	4231.68	4342.04	3083.21		13.6409	18.0848	13.9432	13.9583	12.2876		2337.08	4107.87	2441.82	2447.12	1896.36		0.615423	0.625794	0.577033	0.563588	0.615061
4787.31	45913.4	33207.6	7635.49	3198.35		2209.86	9986.1	8303.64	3379.15	1742.22		10.457	22.2173	19.943	12.2177	9.14154		1373.43	6199.7	4995.39	1874.86	1049.61		0.621499	0.620832	0.60159	0.554832	0.602456
3959.22	38382.2	27382.1	12793.6	4016.82		2057.07	9239.51	7516.73	4631.21	1976.65		9.81553	20.9293	18.7011	14.5114	9.8629		1210.09	5501.7	4392.6	2644.88	1221.8		0.588258	0.595454	0.584377	0.571099	0.618115
11123.7	11110	35237.3	25750.5	2749.29		3826.39	4366.22	8795.28	7479.8	1611.77		13.8503	13.8446	20.3413	18.322	8.69195		2409.41	2407.43	5196.92	4216.33	948.909		0.629682	0.551376	0.590876	0.563695	0.588737
8021.43	16897	15596.5	32590.9	7226.17		3256.58	5642.83	5128.88	7760.21	3003.29		12.4202	15.9214	15.5019	19.8187	11.9954		1937.52	3183.83	3018.3	4933.35	1807.24		0.594954	0.564227	0.588491	0.635723	0.601754
5729.4	33296.9	18730.4	28341.9	8039.14		2765.14	8386.19	6059.88	7514.75	3074.83		11.1023	19.9608	16.4776	18.9171	12.4293		1548.16	5004.34	3410.17	4494.66	1940.37		0.559886	0.596736	0.562745	0.598112	0.631048
4434.38	36675.2	14780.8	8404.53	4280.49		2194.21	8462.93	4659.12	3470.44	2010.77		10.1935	20.6143	15.2268	12.6148	10.0741		1305.07	5337.35	2912.12	1998.72	1274.7		0.594777	0.630674	0.625037	0.575928	0.633934
6843.14	32987.9	20536.2	13509	4388.98		2987.33	8203.34	6179.82	4578.25	2130.39		11.7796	19.8989	16.9909	14.777	10.1586		1742.8	4973.33	3625.97	2742.58	1296.14		0.583397	0.606257	0.586743	0.599046	0.608407
9010.2	41377.4	25062.6	28714.1	2607.85		3256.58	9433.1	7430.33	7513.16	1653.81		12.9109	21.4601	18.1574	18.9995	8.54027		2093.63	5784.33	4140.9	4533.92	916.078		0.642893	0.613195	0.557297	0.603464	0.55392
5575.59	29962.6	24205.7	11041.2	7412.93		2512.08	7817.33	6903.77	4338.43	2792.82		11.0021	19.271	17.948	13.816	12.0978		1520.33	4664.41	4045.97	2397.48	1838.25		0.605208	0.596676	0.586052	0.552615	0.658205
3309.65	32400.2	23664.6	11432.6	2404.6		1696.15	8026.25	6324.04	4317.22	1374.52		9.24637	19.78	17.8133	13.9774	8.31237		1073.82	4914.08	3985.45	2453.81	867.839		0.633093	0.612251	0.630206	0.568377	0.631376
3867.21	14003.5	16060.7	12446.1	2683.38		2037.99	5050.88	5345.74	4503.21	1575.77		9.7389	14.9551	15.6542	14.3788	8.62193		1191.27	2809.11	3077.89	2596.77	933.682		0.58453	0.556162	0.575766	0.576648	0.592524
3607.65	8570.74	6457.23	17288.3	2565.27		1810.78	3507.02	2804.91	5458.7	1464.07		9.51595	12.6975	11.5538	16.0433	8.49353		1137.35	2024.99	1676.65	3232.8	906.079		0.628099	0.577411	0.597754	0.592229	0.618877
3839.74	19371.7	17118.1	3758.69	2618.83		2000.94	5764.67	5516.01	2056.34	1501.42		9.71578	16.6635	15.9905	9.64694	8.55224		1185.62	3487.57	3211.55	1168.88	918.648		0.592531	0.60499	0.582223	0.568425	0.611852
4446.74	9471.62	11699.1	17532.8	2938.81		1987.88	3848.24	4378.12	5796.27	1599.06		10.2029	13.1276	14.0851	16.1186	8.88726		1307.49	2164.51	2491.8	3263.21	992.031		0.657731	0.562468	0.569147	0.562984	0.620384
7673.99	11292.6	20147.6	13077.8	2536.44		2854.75	3951.48	6654.62	4978.14	1458.01		12.2382	13.9201	16.8831	14.618	8.46159		1881.16	2433.74	3580.08	2683.91	899.278		0.658957	0.615905	0.537984	0.539138	0.616784
7040.9	22329.8	9994.83	35727.5	1455.67		2683.48	6517.97	4123.6	8536.22	1006.13		11.892	17.4718	13.365	20.4352	7.03177		1776.22	3834.13	2243.51	5245	621.04		0.661908	0.58824	0.544065	0.614441	0.617256
7367.74	7439.14	23825.3	9992.05	1400.74		3605.4	2942.49	6696.52	3955.75	955.658		12.0732	12.1121	17.8535	13.3638	6.94219		1830.77	1842.58	4003.47	2243.09	605.316		0.507785	0.626197	0.597843	0.567046	0.633403
4526.39	11846	10597.7	10044.2	1635.57		2306.53	4285.88	3790.15	3518.83	1093.07		10.2635	14.1439	13.6285	13.387	7.31027		1323.06	2512.61	2332.84	2250.89	671.208		0.573614	0.586253	0.615501	0.63967	0.614057
4537.38	14385.3	15170.8	10685.6	2454.04		2117.29	4829.93	5019.26	4262.67	1596.69		10.2718	15.0898	15.3596	13.6661	8.36895		1325.2	2859.94	2963.12	2345.72	879.694		0.625894	0.592128	0.590351	0.550294	0.550949
3543.11	6806.05	13602.5	11236.3	8254.75		1882.57	2735.08	4883.75	4156.72	3264.85		9.45886	11.7582	14.811	13.8969	12.5395		1123.74	1736.5	2755.22	2425.64	1974.91		0.59692	0.634898	0.564161	0.583547	0.6049
2651.84	28895.5	5214.4	23808.7	6597.21		1511.11	7018.56	2449.97	6575.91	2889.32		8.58802	19.0394	10.7592	17.8494	11.6367		926.351	4553	1453.94	4001.61	1700.79		0.613027	0.648708	0.593453	0.608525	0.588647
4049.85	11251.4	11497.2	13682.1	4766.63		1997.59	4269.41	4230.91	5012.71	2294.1		9.88986	13.9031	14.0036	14.8398	10.4419		1228.49	2427.81	2463.04	2765.96	1369.47		0.614984	0.568653	0.582155	0.551789	0.596952
3508.77	13533.8	5837.87	5033.1	6183.85		1957.54	4824.45	2906.63	2470.59	3001.91		9.4282	14.786	11.1719	10.633	11.3884		1116.47	2745.94	1567.64	1420.04	1628.98		0.570344	0.569171	0.539333	0.574778	0.542649
2535.11	7432.27	7430.89	18764.6	4067.64		1457.7	3175.44	3523.82	5776.65	1920.67		8.46011	12.1083	12.1076	16.4876	9.90432		898.963	1841.44	1841.22	3414.32	1232.08		0.6167	0.579902	0.522506	0.591055	0.641485
2745.22	9622.68	8053	8197.16	2967.64		1584.93	3806.37	3300.03	3515.06	1770.99		8.68766	13.197	12.4365	12.5102	8.91622		947.972	2187.47	1942.6	1965.71	998.508		0.598116	0.574686	0.58866	0.559225	0.563813
2764.45	18650.7	8572.1	14029.5	3041.8		1508.55	5696.78	3346.66	4780.83	1715.65		8.7079	16.4542	12.6981	14.9644	8.98988		952.394	3400.48	2025.2	2812.58	1015.07		0.631331	0.596913	0.605142	0.588305	0.591656
12915.9	7131.52	7027.14	22167.6	4828.43		5136.08	3296.35	2886	6958.08	2502.67		14.5575	11.9428	11.8842	17.4294	10.4869		2661.71	1791.43	1773.9	3815.54	1381.28		0.518237	0.543457	0.614658	0.548362	0.551922
8620.19	6369.34	8640.76	6318.5	1097.25		3607.2	3023.91	3253.11	3006.89	920.232		12.7218	11.5012	12.7319	11.4705	6.3995		2032.77	1661.4	2036	1652.55	514.376		0.563532	0.54942	0.625864	0.549586	0.558964
8400.43	6569.85	14107.8	14088.6	1952.79		3277.14	3400.06	4941.83	5028.1	1209.65		12.6128	11.6206	14.9921	14.9853	7.75525		1998.07	1696.09	2823.04	2820.48	755.407		0.609701	0.49884	0.571254	0.560943	0.624484
38898.5	6420.16	8224.66	12163.2	6304.7		8704.93	2958.55	3327.56	4672.09	3092.24		21.0227	11.5317	12.5242	14.269	11.4621		5550.93	1670.22	1970.1	2557.27	1650.14		0.637677	0.564541	0.592057	0.54735	0.533638
34446.3	12152.3	7020.28	22653.8	3194.23		8044.26	4270.67	3004.15	6526.24	1931.85		20.1879	14.2647	11.8803	17.5559	9.13761		5118.85	2555.74	1772.75	3871.13	1048.71		0.636336	0.59844	0.5901	0.593164	0.542852
35362.3	3571.94	8940.14	13032.5	22712.8		7932.67	2058.93	3471.43	4633.44	5883.63		20.3653	9.48445	12.8773	14.6011	17.5712		5209.2	1129.83	2082.76	2677.7	3877.85		0.656677	0.548747	0.599973	0.577908	0.659092
21125.4	5968.34	5424.51	13664.2	45384.4		5872.66	2856.67	2423.19	5264.55	9549.33		17.1519	11.2546	10.9018	14.8333	22.1316		3695	1590.91	1492.74	2763.55	6151.98		0.629186	0.556912	0.616023	0.524935	0.644232
44849	5292.68	5685.44	12588.9	54041.6		9356.82	2310.32	2550.05	4328.89	11078.2		22.0442	10.8127	11.0738	14.4335	23.4578		6103.5	1468.46	1540.23	2616.59	6911.35		0.652305	0.635607	0.604002	0.604449	0.623869
54891.9	5744.49	18043.7	4987.79	43389		10562	2519.35	5727.62	2340.97	9455.57		23.5802	11.1121	16.2737	10.601	21.8024		6983.66	1550.88	3326.3	1411.51	5970.31		0.661206	0.615588	0.580747	0.602958	0.631407
49205.1	14934.6	8272.72	8160.08	46868.9		10968.3	4976.66	3357.3	3553	10282.8		22.736	15.2795	12.5485	12.4913	22.3703		6492.58	2932.29	1977.77	1959.78	6285.41		0.591941	0.589208	0.589096	0.551584	0.611255
40473.7	4454.97	6808.79	3934.47	19665.5		9255.6	2361.01	3048.99	2053.06	5448.19		21.3027	10.2092	11.7598	9.79503	16.7473		5699.8	1309.1	1736.96	1205.04	3522.74		0.615821	0.554467	0.569685	0.586948	0.646589
26037.6	5961.48	18943.2	4292.9	2654.57		7240.49	2975.8	6137.74	2070.94	1612.98		18.3898	11.2502	16.5397	10.0839	8.59096		4247.61	1589.69	3435.95	1277.16	926.987		0.586647	0.534207	0.559806	0.616704	0.574704
16855.8	3254.71	21493.4	9170.83	5955.95		5519.84	1806.53	5863.64	3825.98	2715.6		15.9084	9.19492	17.2509	12.9871	11.2468		3178.66	1061.9	3737.78	2118.44	1588.71		0.57586	0.587815	0.637451	0.553699	0.585031
11167.6	5615.4	6954.36	9519.64	7855.2		4676.34	2676.77	2830.58	3450.74	3478.07		13.8685	11.0282	11.843	13.1497	12.3338		2415.74	1527.56	1761.63	2171.82	1910.65		0.516588	0.570672	0.622358	0.629379	0.549343
33767.8	5387.44	15332.8	2727.35	3834.22		7729.87	2549.22	4923.15	1500.78	2035.08		20.0545	10.8769	15.4141	8.66877	9.71113		5051.41	1485.93	2984.18	943.854	1184.48		0.653492	0.582897	0.606153	0.628909	0.582033
3684.54	8675.11	18078	7838.73	21993.2		1949.61	3373.53	5106.36	3105.72	6163.07		9.58308	12.7488	16.284	12.3252	17.3836		1153.45	2041.4	3330.51	1907.98	3795.51		0.591632	0.605122	0.652228	0.614345	0.615847
1709.75	6747	18950.1	5222.62	5874.92		1106.15	2956.35	5169.24	2388.81	2642.93		7.41916	11.7241	16.5417	10.7648	11.1955		691.352	1726.44	3436.78	1455.47	1574.27		0.625007	0.583976	0.664852	0.609286	0.595653
3662.57	2878.43	5354.47	3530.73	10427.4		1882.24	1622.13	2364.57	1741.08	4176.04		9.56399	8.82597	10.8547	9.44783	13.5551		1148.86	978.396	1479.86	1121.12	2307.78		0.61037	0.603155	0.625849	0.643925	0.552624
796.51	2760.32	17520.5	3588.4	7186.42		681.962	1547.17	4919.96	2040.38	4038.89		5.75141	8.70356	16.1148	9.49899	11.9733		415.469	951.445	3261.68	1133.3	1800.61		0.609225	0.614958	0.662949	0.555435	0.445817
914.613	3044.6	14492.4	6774.44	6929.61		767.53	1699.09	4854.75	3005.77	3146.69		6.02268	8.99264	15.1272	11.74	11.829		455.585	1015.7	2874.12	1731.12	1757.45		0.593572	0.597789	0.592021	0.575931	0.558508
3831.49	5204.79	4553.84	14172.3	276.031		1881.38	2494.7	2497.07	5256.33	340.696		9.70882	10.7526	10.2842	15.015	4.03983		1183.92	1452.15	1328.4	2831.64	204.982		0.629283	0.582096	0.531984	0.53871	0.601657
1181.03	3823.25	5285.81	21421.9	2173.91		868.154	2211.6	2382.21	7293.26	1367.62		6.55839	9.70185	10.8081	17.2318	8.03756		540.237	1182.22	1467.19	3729.49	811.406		0.622283	0.534555	0.615893	0.511361	0.593298
1598.51	10350.5	11210.2	14489.6	1866.3		1028.82	3792.28	3935.14	5796.93	1152.08		7.25464	13.5217	13.8861	15.1262	7.63902		661.03	2296.42	2421.88	2873.75	732.934		0.642512	0.605552	0.61545	0.495736	0.636183
1153.57	3375.56	4832.62	21375.2	1623.23		773.93	1915.61	2272.19	7206.66	1069.07		6.50717	9.30735	10.4899	17.2192	7.29184		531.831	1088.03	1382.08	3724.07	667.827		0.687182	0.567981	0.608258	0.516754	0.62468
15195.5	2963.57	8031.02	18288.1	950.315		5074.87	1686.82	3185.15	6604.03	769.708		15.3679	8.91215	12.4251	16.3468	6.10005		2966.34	997.595	1939.06	3356.27	467.365		0.584515	0.591406	0.608781	0.508215	0.607197
	2551.58	5370.95	12977.6	1499.63			1545.04	2633.81	4641.77	1000.46			8.47839	10.8658	14.5806	7.10186			902.853	1482.9	2670.18	633.481			0.584355	0.563024	0.57525	0.63319
	4394.55	5910.66	9596.57	1535.34			2203.26	2480.23	3736.31	1023.14			10.1628	11.2182	13.1851	7.15779			1297.24	1580.65	2183.51	643.498			0.588782	0.637298	0.584402	0.628944
	1858.07	8194.44	12550.5	880.277			1189.59	3395.32	4829.42	672.543			7.62778	12.5088	14.4189	5.94635			730.778	1965.28	2611.27	444.11			0.614311	0.578819	0.5407	0.660344
	1753.7	4111.64	11777.4	1507.87			1133.42	2227.25	4608.05	1124.75			7.48219	9.9399	14.1165	7.11484			703.149	1240.95	2502.9	635.799			0.620378	0.557167	0.543158	0.56528
	1532.6	4279.18	56166.3				1158.14	2172.46	11979.4				7.15353	10.0731	23.7612				642.732	1274.44	7091.33				0.554969	0.586632	0.591961
	1760.56	9533.41	42778				1230.01	3661.3	10117.8				7.49194	13.1561	21.6995				704.982	2173.92	5914.13				0.573151	0.593755	0.584527
	1682.29	2636.72					1056.8	1555.09					7.37923	8.57167					683.929	922.827					0.64717	0.593423
	2517.25	3116					1469.89	1678.04					8.4402	9.0624					894.736	1031.52					0.60871	0.614714
	2298.9	4178.93					1616.07	2174.73					8.18874	9.99384					842.217	1254.45					0.521151	0.576831
	720.98	3830.12					644.272	2214.6					5.56355	9.70766					388.77	1183.64					0.603425	0.53447
	1837.47	8348.25					1269.41	3422.86					7.59948	12.5866					725.367	1989.79					0.57142	0.581324
	1378.79	4275.06					897.942	2133.38					6.90574	10.0699					598.976	1273.62					0.667054	0.596995
	1121.98	3681.8					803.948	2009.7					6.44722	9.5807					522.076	1152.88					0.649391	0.573658
	1557.32	3334.36					1053.26	1895.35					7.19178	9.26932					649.625	1079.16					0.616775	0.569372
	653.689	2397.77					586.738	1355.13					5.38478	8.30449					364.187	866.195					0.620698	0.639197
	726.473	4206.4					616.145	1966.7					5.57764	10.0157					390.742	1259.94					0.634173	0.640638
	1330.72	8874.22					906.606	3415.28					6.82453	12.8456					584.972	2072.51					0.645233	0.606836
	11042.7	4340.98					3910.95	2045.02					13.8166	10.1214					2397.7	1286.68					0.613073	0.629175
	15379.5	6337.75					4973.4	2921.3					15.4297	11.4821					2990.24	1655.9					0.601246	0.566837
	43769.7	2916.88					10778.9	1669.97					21.866	8.86509					6005.19	987.089					0.557124	0.591082
	9335.66	5103.16					4030.15	2198.84					13.0645	10.6821					2143.75	1433.19					0.531928	0.651793
	15114.5	3116					5258.02	1916.7					15.3406	9.0624					2955.79	1031.52					0.562148	0.538173
	23904.9	3381.05					6450.2	1680.38					17.8734	9.31239					4012.38	1089.21					0.622055	0.648193
	36702.6	2682.04					9126.28	1589.27					20.6194	8.6205					5340.01	933.371					0.585124	0.587295
	32858.8	19283.8					8413.9	6896.22					19.8729	16.6383					4960.34	3477.01					0.589542	0.504191
	11881.7						4305.56						14.158						2517.66						0.584745
	47963.7						11020						22.5432						6382.92						0.579212
	30901.8						8269.64						19.4703						4761.38						0.575767
	35307.4						8572.03						20.3548						5203.81						0.607068
	13347						4750.79						14.7176						2720.61						0.572665
	39545.4						9377.88						21.1386						5612.31						0.598462

## Sheet: figure 1M
x-position					volumes
WT 1	WT 2	WT 3	WT 5		WT 1	WT 2	WT 3	WT 5
277.568	120.43	221.144	320.569		35303.2	36204.1	28461.4	17249.9
229.157	158.368	192.504	284.413		36805.6	32755.8	20999	13966.4
2013.26	196.726	177.619	251.771		11714.2	33951.9	27434.2	6475.07
313.317	172.313	266.426	303.244		35962.4	37492.3	36735.5	35207.1
340.498	140.413	311.304	349.247		31267.1	33930	37136.5	24951.3
355.787	305.242	244.313	421.792		34222.5	28212.9	29631.5	28988.8
421.343	236.516	426.084	390.91		39111.4	30601.1	38483.7	28986.1
394.66	277.295	407.442	405.685		36307.1	37471.7	44947.8	36613.3
464.028	342.7	345.579	340.802		44997.3	45501.3	33511	36676.5
532.231	202.085	441.437	372.594		39973.8	29020.4	46233.2	38248.9
445.198	318.105	517.27	436.031		39130.6	38213.3	46535.3	29146.7
496.671	257.402	462.809	536.999		45052.2	25485.6	43089.7	30426.6
471.962	290.807	503.668	449.175		37797.1	39647	37908.3	31622.8
559.871	424.074	549.362	480.977		45795.2	38882.1	43839.5	32438.5
597.596	367.304	570.867	517.186		43700.9	49956.3	44623.7	23146.8
569.088	381.036	644.604	510.047		42561.1	37707.9	55730.8	29193.4
582.762	339.022	588.857	493.275		39986.2	31442.9	43739.3	36048.9
641.565	406.959	606.646	464.82		48845.3	41635.5	49220.1	34039.8
668.534	468.94	670.687	642.812		40079.6	44148.7	37122.8	42279.5
720.652	498.119	487.113	567.911		47320.9	45493.1	34652.2	32533.3
535.448	436.27	540.162	594.993		39520.6	40281.5	38588.1	27920.4
652.104	516.146	625.325	615.838		37573.3	43672.1	43055.4	36782.2
613.746	452.963	743.727	630.892		39638.7	35119.2	37668	36653.1
743.046	484.701	706.67	590.7		43343.9	44334	35689	46818.2
750.44	547.834	672.478	678.444		50277.6	43629.5	44737.6	34931
681.271	530.159	698.667	713.015		40828	39965.6	44049.6	43240.8
710.581	642.387	774.921	748.238		45667.5	49411.1	40767.5	42952.4
771.32	610.332	811.129	660.983		46053.4	43166.7	36466.3	49063.6
797.849	562.412	727.281	689.74		45627.7	55089.7	51795	45719.6
843.245	679.549	758.528	777.202		42967.6	46847.2	40211.3	39644.2
785.311	714.234	837.418	805.315		43294.4	41950	44476.7	35201.6
864.836	629.919	793.011	835.927		46586.2	46253.9	59024	37711.9
893.863	594.011	825.485	869.785		44667.7	44373.9	32956.2	45060.4
919.013	757.081	857.6	900.497		49894.5	43310.9	52691.7	46531.2
981.441	747.766	890.863	940.342		46840.3	53088.8	40108.3	41862
819.446	726.4	989.67	969.783		53889.4	40186.7	37978.3	39028.9
864.734	661.626	1891.5	996.312		43543	45219.8	10036	41108.1
964.862	696.094	960.864	181.39		51834.9	53098.4	37966	11651
931.422	850.395	919.647	735.562		58359.5	36551.6	38409.5	33804.9
893.257	795.365	875.943	715.54		42676.4	42866	43273.7	34623.4
1059.59	850.059	936.061	816.905		48164.1	40385.8	31054.2	50133.4
1010.16	777.612	1011.83	761.452		46642.5	57221	45627.5	35286.7
1032.72	805.08	909.285	788.238		48232.8	35606.8	43674.7	35562.7
1038.35	882.639	951.012	852.215		42451.2	40377.6	39385.9	58257.7
1000.65	922.181	1058.26	911.624		48837	46941.9	45189.5	27783
1085.27	952.084	1119.09	1053.96		46325.3	44080	42569.2	41765.9
1167.37	894.666	1069.72	1025.68		41673.9	42003.6	42110.5	33634.6
1137.81	1994.21	1101.14	1082.57		53222	9203.82	39965.5	42186.1
1107.66	826.454	1327.66	1444.52		53088.8	37135.2	21739.2	18926.7
1196.35	935.243	983.543	928.674		39658	41702.8	44945	37544.4
1222.76	908.769	1035.76	890.563		40855.5	32342.4	34737.4	39859.8
1246.33	871.008	1087.82	959.585		39611.3	38677.4	34223.7	41943.1
1181.3	1059.52	1149.22	1022.6		41855.2	45346.2	38950.6	29400.8
1075.22	978.362	1179.46	1046.99		40741.5	47297.6	39402.4	41422.6
1151.21	1001.97	1211.07	995.734		41514.6	33825.6	39715.5	48793
1115.72	1026.06	1158.84	1138.17		39480.8	39133.4	40573.8	40789.5
1272.43	1071.81	1129.36	1162.08		36997.9	40020.5	32542.8	48662.6
1214.99	1097.41	1223.94	1180.75		46374.7	40189.4	43559.4	35792.1
1252.41	1121.76	1190.9	1107.07		37665.3	44386.2	39512.3	46501
1283.46	963.088	1248.99	1077.72		39075.7	31407.2	34414.6	37235.4
1300.83	1045.4	1273.28	1209.68		39642.8	44235.2	36585.8	46358.2
1379.49	1172.23	1273.85	1243.6		34166.2	30307.2	28583.6	37246.4
1352.97	1137.6	1310.1	1278.64		28651	43175	38662.2	45129.1
1329.02	1152.56	1338.79	1310.35		46142.6	44286	31692.8	29292.3
1314.82	1096.3	1367.78	1368		39388.8	45666.1	34708.5	32367.1
1417.28	1166.2	1299.95	1111.52		37111.9	24040.9	42846.6	37666.6
1451.05	1274.71	1392.59	1138.53		40689.3	48717.6	35131.5	33475.3
1400.79	1254.5	1396.45	1225.07		41539.4	38065	36699.8	46396.6
1513.95	1190.39	1355.71	1189.62		33151.3	35260.7	34832.1	35249.6
1428.88	1197.64	1456.82	1257.16		35882.8	41141.1	22333.8	36179.3
1377.47	1224.66	1483.75	1320		33544.1	39056.5	27914.9	34946.1
1350.65	1372.94	1424.83	1369.81		37128.3	30878.5	33096.3	35031.3
1459.68	1353.36	1449.26	1291.09		35207.1	40553.4	32132.2	42716.2
1485.43	1327.28	1478.92	1400.27		34244.4	35119.2	25205.4	34624.8
1554.47	1317.51	1531.22	1337.87		31326.2	37798.5	31334.3	29790.8
1583.62	1442.81	1505.46	1462.89		29694.7	27739.2	28454.6	27095
1521.89	1501.6	1588.25	1421.17		30945.8	42242.5	19738.3	32249
1608.92	1395.56	1597.48	1509.07		25502	37110.5	22398.3	32038.9
1628.52	1468.58	1543.77	1587.89		18323.8	34288.4	22912	38261.3
1651.07	1247.64	1571.5	1556.9		26391.9	43209.3	19278.2	26856.1
1760.5	1379.93	1638.16	1536.62		18766	36669.7	14566.5	26374.1
1682.08	1297.59	1623.96	1523.85		20898.8	31227.3	18226.3	29907.5
1784.14	1342.23	1669.76	1641.92		17017.8	31166.9	17837.7	30562.6
1714.46	1478.41	1745.93	1617.76		19492.5	41197.4	14304.2	21924.6
1745.7	1411.16	1694.56	1691.46		17019.2	33041.4	14581.6	32623.9
1891.47	1442.09	1866.47	1486.13		19531	34225.2	15275.1	26694
1810.87	1520.08	1958.64	1432.72		15824.5	40116.7	7689.05	28554.8
1874.02	1579.73	1515.69	1460.55		15722.8	33876.4	16403.9	22188.3
1969.28	1688.85	1561.84	1397.26		17199.1	19768.6	26367.2	24407.5
623.212	1619.75	1658.48	1564.99		34245.8	35035.5	14293.2	30480.2
693.342	1667.67	1614.45	1609.37		33419.1	18538.1	18281.2	30761.7
824.989	1726.51	1681.89	1726.26		33725.3	14905.7	15456.4	28366.7
951.599	1752.47	1647.2	1654.54		41056	21332.7	16748.6	29582.1
260.012	1733.58	1703.74	1757.75		33664.9	20260.2	13101.2	27453.5
382.01	1850.2	1759.28	1789.43		35818.2	15512.7	7469.32	18008
411.366	1967.92	1733.8	1840.69		38150.1	16082.6	11475.2	20565
437.466	1710.63	1718.52	1822.93		27369.7	13245.4	14904.3	18874.5
1488.24	1789.05	1764	1887.52		32404.2	16717.1	15773.6	20414
1541.28	1912.12	1722.24	1918.69		26327.4	14524	9667.96	18170
1571.6	1884.24	1802.63	1856.83		26560.9	15613	10814.7	17196.3
1632.75	1638.62	1780.59	2140.4		16956	19081.7	14897.4	14687.3
1679.88	1607.76	1808.49	1675.61		18948.7	27719.7	9474.32	21275
1604.46	1678.67	1792.45	1744.44		20457.9	15298.3	10566.1	15994.7
1660.01	1704.17	1826.05	1710.23		20140.7	18123.2	14400.3	21258.5
1695.78	1649.23	1849.97	1778.13		12827.9	26283.2	14150.4	18893.7
1713.02	1801.3	1833.76	1807.17		18900.6	16450.5	11710	21119.8
1737.13	1776.5	1874.52	1901.47		16945.1	15400	5686.79	12891.1
1770.12	1762.47	1914.53	1938.49		13927.9	13447.2	11971	15043
1800.93	1829.44	1894.14	1967.65		16136.2	16234.9	9786.06	13132.8
1829.31	1817.97	1968.2	1948.77		16235.1	16303.6	8941.49	11935.3
1841.41	1897.73	1941.48	1999.09		16652.6	12617.7	8202.66	7598.42
1859.15	1871.83	1920.01	2004.11		15887.6	13478.8	8173.82	9688.56
1919.73	1926.46	1991.86	1978.67		10996	13160.1	5118.25	15194.1
1912.66	1949.89	2000.06	2028.6		12558.8	10914.8	6656.33	11399.7
1940.32	2017.82	2073.2	2051.24		11266.5	5754.05	3749.08	6120.76
1967.53	2010.16	2046.45	2062.63		9956.38	8033.69	4378.05	8664.09
1992.54	1988.58	2021.24	2013.62		11435.4	9416.59	5789.79	7485.81
2050.65	1557.59	2033.01	2043.44		8735.52	31574.5	5582.42	8529.51
2125.4	1940.25	2085.42	2115.61		5309.15	10850.3	3147.58	2599.64
1942.21	583.249	2095.94	2120.21		9479.84	34752.6	2044.83	2668.3
2035.05	396.27	2105.55	2077.51		10518	29635.7	1899.26	3506.01
2062.19	824.735	1940.82	2081.23		7185.07	32909.6	7283.93	2590.03
2087.23	1220.44	1980.25	2099.93		3966.07	34633.1	7373.19	6373.44
2075.6	1423.28	2012.37	2159.06		6812.91	26389.2	1995.39	2986.91
2111.85	1583.57	359.309	2209.9		4894.42	26249.1	26091.1	6785.43
2005.4	1660.54	329.32	2191.58		4244.85	5398.42	35020.3	2715
2021.41	1295.37	472.421	2176.56		3219	30724.7	25832.9	5918.88
2098.18	1539.27	160.16	1870.63		7360.85	37068	11379.1	11911.9
2139.63	2044.53	207.826	2115.85		4272.31	6709.92	25319.3	5462.95
2162.03	2037.57	1031.58	2094.34		5218.51	9187.34	33373.7	6444.85
2175.79	2061.03	1245.07	2077.39		1300.51	7910.18	24886.7	5188.29
2186.1	2078.02	1426.31	2163.81		1402.13	9021.17	19366.1	3534.85
2149.69	2096.27	2048.99	2189.29		1531.22	4498.91	2296.14	1906.13
490.004	2108.99	2049.94	2232.53		27051.1	4121.26	3337.09	1485.9
513.146	2119.74	2061.39	2244.77		38573.1	3044.59	2515.87	1395.26
243.61	2132.41	2011.46	1345.18		28640	4239.36	4273.68	23991.4
326.592	2077.33	284.772	1490.05		33493.2	1306	39215.7	20911.1
166.686	2147.58	299.286			25547.4	2601.02	17644
193.269	1853.83	376.564			42833	11281.6	44593.5
211.338		388.912			30941.7		29853.9
369.773					26354.9
296.3					39907.9

## Sheet: figure 1N
x-position						volumes
spzl 1	spzl 2	spzl 3	spzl 4	spzl 5		spzl 1	spzl 2	spzl 3	spzl 4	spzl 5
355.527	178.006	206.885	326.905	285.557		14930.5	44343.7	6826.64	5064.69	44649.7
427.275	239.551	175.889	322.527	317.867		24165.9	51620.8	11169	9411.15	33912
518.306	269.619	197.069	376.378	373.74		44765.4	43089.9	19910	22590.6	33219.8
538.239	290.24	187.974	395.829	339.499		27599.2	40716.8	7353.99	47189	28704.5
623.183	254.649	157.534	434.938	356.302		35063	12534.1	15041.7	29205.7	22828.2
666.865	328.694	222.605	408.717	395.256		14653.1	4743.36	28829.6	16512.4	37923.3
641.457	344.552	170.147	531.854	424.897		11940.8	29319.9	10935.5	15899.9	45096
687.507	336.305	228.229	463.853	477.487		62012.6	13047.7	7360.85	53367.4	36706.6
653.806	356.611	248.913	551.886	503.67		10143.2	18328	5939.5	50570	39635.8
727.065	212.027	311.54	586.729	534.125		61180.4	7380.09	19926.5	31427.7	39089.3
709.411	211.175	267.587	611.806	557.193		10699.4	8224.67	37931.8	39579.6	44895.5
757.607	423.673	289.589	532.145	580.613		52645.4	54585.7	35220.9	7936.24	40998.1
812.193	389.728	329.422	650.095	654.101		27198.2	17495.8	37360.5	49746	27483.6
857.517	365.96	245.29	626.13	714.993		31224.7	13904.6	22723.9	35621.8	41496.6
789.966	448.59	310.064	586.792	738.746		48823.5	50106.1	10996	22519.2	35830.4
831.365	509.796	304.088	731.771	762.027		27207.8	18166	6639.88	13802.9	40369.2
882.396	489.913	435.423	702.61	787.663		28925.8	14581.7	30112.2	38397.2	37460.5
944.13	499.576	420.882	680.673	832.746		40495.8	33778.9	32692.6	51757.9	44178.7
965.517	462.575	385.459	729.068	809.13		42970.5	10721.3	13927.9	57584.8	14072.1
991.801	528.526	348.934	808.501	869.861		54017.3	21092.4	41181	11501.3	43390.4
1040.87	581.686	408.641	842.821	896.035		28655.2	50042.9	12810.1	53338.6	30787.7
1139.23	625.354	370.617	817.281	936.133		25834.5	29498.4	44954.8	40532.6	37772.3
1117.96	555.532	396.26	796.06	912.915		38959.1	35888.3	33568.8	14698.3	16656.6
1094.97	598.873	537.988	789.105	201.423		33151.4	9700.96	48333.1	27078.5	12402.2
1076.65	652.311	465.399	763.678	187.303		29951.6	31510.3	22423.1	17310.3	7279.8
1196.16	676.215	488.72	953.165	260.791		26326.1	66168.1	17285.7	15895.8	21645.8
1179.6	749.781	508.935	888.712	626.559		26114.6	11756.8	34975	11406.5	35540.7
1218.13	727.962	516.216	952.66	599.75		41418.7	11748.5	13731.6	13447.2	27636
1260.49	788.072	453.518	915.061	853.454		28634.6	12734.6	25470.5	62810.1	10314.8
1293.21	526.808	480.655	891.22	961.931		23211.5	30679.4	32846.4	23590.4	14344
1313.37	607.236	555.871	871.178	917.375		25389.5	19587.3	21634.9	41588.7	7077.92
641.799	719.611	642.619	936.634	1011.38		17965.5	7260.61	25389.5	20565	28465.5
660.139	700.532	576.805	1063.78	970.654		7962.38	35256.6	26831.4	43593.7	9284.8
843.784	735.089	597.126	996.335	995.723		23341.9	13345.7	12940.5	12685.1	5798.02
817.926	761.107	600.936	1001.78	989.895		14863.2	39056.5	40733.3	11965.5	7991.16
900.296	474.58	741.348	1022.67	979.369		29781.3	10920.4	19315.4	16780.2	5218.49
926.317	613.273	702.15	1042.11	1070.31		22441.1	15758.6	18551.8	33237.7	21942.4
871.83	584.059	675.995	974.928	1039.16		17379.1	16888.8	42260.4	37242.2	35040.8
1012.84	637.153	642.764	981.604	1107.65		15176.3	18079.4	6453.11	11519.2	25734
1027.66	743.495	657.683	1169.01	1086.62		8732.8	14345.4	9585.59	27426	8809.64
1060.65	718.908	723.728	1122.3	807.46		4817.53	28000.1	16751.4	11255.5	6424.24
1334.38	737.05	435.66	1084.43	405.285		22566	9960.51	7933.52	21876.5	8919.5
1240.52	652.042	621.604	1141.59	646.533		9724.32	13031.2	17806.1	20610.3	10117
1277.04	841.084	564.995	1123.07	666.584		8903.09	26028.1	13882.6	9853.35	17144.1
1361.98	794.198	718.438	1100.84	1137.14		19999.3	36461	7134.26	32479.7	29784.9
1378.7	918.628	695.614	1147.05	1206.84		7654.76	17520.5	19511.8	26489.4	7198.7
1349.21	898.038	660.028	1116.53	1190.04		6731.9	11511	4795.54	11814.4	7050.39
1424.99	906.173	655.58	1279.42	1264.61		16170.6	30893.7	7319.66	14344	4673.25
1470.24	848.306	729.939	1273.65	1250.93		14260.3	26641.9	12369.3	17587.7	4172
1387.07	988.925	710.904	1234.74	1297.68		8463.63	29240.2	7922.53	19908.6	15938.2
1438.28	1010.28	855.663	1208.51	1278.46		4297.05	9430.42	24823.7	12620.5	4791.35
1404.17	1033.88	761.158	1253.61	1335.85		5355.86	22342.1	10424.7	32677.4	20715.8
1487.1	966.735	758.808	1185.63	1360.03		7131.53	32746.2	12069.9	9461.96	7818.05
1496.62	1049.48	795.735	1310.3	1418.3		5174.58	12539.6	15000.5	9250.48	3787.49
1509.9	1077.84	845.653	1329.71	1401.57		10626.6	24763.3	11348.9	11385.9	7767.23
1522.08	1112.41	823.361	1294.69	1428.16		4787.31	45913.4	33207.6	7635.49	3198.35
1568.16	787.975	802.251	1347.08	1454.45		3959.22	38382.2	27382.1	12793.6	4016.82
1589.52	956.107	777.011	1329.1	1448.31		11123.7	11110	35237.3	25750.5	2749.29
1557.44	889.652	840.556	1485.5	1467.82		8021.43	16897	15596.5	32590.9	7226.17
1574.99	932.235	959.824	1514.71	1510.74		5729.4	33296.9	18730.4	28341.9	8039.14
1542.05	1017.98	871.247	1081.35	1492.38		4434.38	36675.2	14780.8	8404.53	4280.49
1605.02	1054.13	949.666	1228.77	1530.51		6843.14	32987.9	20536.2	13509	4388.98
1636.62	1140.06	899.635	1384.63	1523.29		9010.2	41377.4	25062.6	28714.1	2607.85
1621.77	1168.88	927.446	1364.98	1584.39		5575.59	29962.6	24205.7	11041.2	7412.93
1653.78	1085.48	880.326	1291.93	1567.82		3309.65	32400.2	23664.6	11432.6	2404.6
1654.14	1169.72	908.91	1306.35	1542.77		3867.21	14003.5	16060.7	12446.1	2683.38
1686.63	1196.02	1042.94	1359.21	1558.06		3607.65	8570.74	6457.23	17288.3	2565.27
1616.99	1221.02	1065.52	1465.56	1612.87		3839.74	19371.7	17118.1	3758.69	2618.83
1667.72	1254.42	1055.93	1449.37	1601.59		4446.74	9471.62	11699.1	17532.8	2938.81
1704.12	1259.98	980.253	1401.84	1629.99		7673.99	11292.6	20147.6	13077.8	2536.44
1721.8	1237.01	1009.75	1424.56	1673.43		7040.9	22329.8	9994.83	35727.5	1455.67
1054.55	1212.36	1027.85	1462.5	1651.74		7367.74	7439.14	23825.3	9992.05	1400.74
1019.39	1356.95	1008.07	1564.27	1720.45		4526.39	11846	10597.7	10044.2	1635.57
1462.85	1301	994.646	1592.65	1216.85		4537.38	14385.3	15170.8	10685.6	2454.04
1736.81	1376.78	1106.6	1584.58	1192.2		3543.11	6806.05	13602.5	11236.3	8254.75
1799.04	1330.79	1126.39	1542.25	1273.07		2651.84	28895.5	5214.4	23808.7	6597.21
1751.19	1417.46	1099.37	1566.08	1256.04		4049.85	11251.4	11497.2	13682.1	4766.63
1746.95	1435.88	1118.33	1525.09	1314.82		3508.77	13533.8	5837.87	5033.1	6183.85
1807.47	1195.36	1127.15	1707.61	1371.74		2535.11	7432.27	7430.89	18764.6	4067.64
1770.31	1303.44	1151.79	1685.36	1418.92		2745.22	9622.68	8053	8197.16	2967.64
1824.75	1396.14	933.005	1611.29	1486.15		2764.45	18650.7	8572.1	14029.5	3041.8
776.878	1357.8	1045.16	1645.96	1478.14		12915.9	7131.52	7027.14	22167.6	4828.43
1244.76	1374.1	976.195	1669.39	1500.42		8620.19	6369.34	8640.76	6318.5	1097.25
254.543	1397.59	1167.6	1677.12	1542.08		8400.43	6569.85	14107.8	14088.6	1952.79
330.935	1461.15	1177.78	1633.55	1157.31		38898.5	6420.16	8224.66	12163.2	6304.7
402.455	1468.49	1155.3	1821.76	1381.42		34446.3	12152.3	7020.28	22653.8	3194.23
377.343	1449.78	1135.79	1729.78	92.753		35362.3	3571.94	8940.14	13032.5	22712.8
427.606	1436.75	1204.77	1752.85	168.035		21125.4	5968.34	5424.51	13664.2	45384.4
454.324	1593.79	1245.19	1786.4	226.997		44849	5292.68	5685.44	12588.9	54041.6
487.522	1537.7	1223.77	1731.98	452.127		54891.9	5744.49	18043.7	4987.79	43389
560.293	1506.63	1206.65	1765.77	688.514		49205.1	14934.6	8272.72	8160.08	46868.9
587.606	1532.11	1232.42	1912.38	1233.64		40473.7	4454.97	6808.79	3934.47	19665.5
600.521	1573.43	1189.65	1848.93	1220.6		26037.6	5961.48	18943.2	4292.9	2654.57
1019.84	1594.76	1262.91	1856.81	956.041		16855.8	3254.71	21493.4	9170.83	5955.95
905.157	1574.85	1246.52	1881.2	983.326		11167.6	5615.4	6954.36	9519.64	7855.2
1159.72	1522.6	1385.39	1969.52	954.565		33767.8	5387.44	15332.8	2727.35	3834.22
1915.98	1549.81	1284.47	1939.57	1171.12		3684.54	8675.11	18078	7838.73	21993.2
1781.86	1704.58	1305.81	1956.04	605.612		1709.75	6747	18950.1	5222.62	5874.92
1787.07	1676.19	1348.22	1991.55	619.181		3662.57	2878.43	5354.47	3530.73	10427.4
1882.45	1690.88	1329.81	1919.86	518.988		796.51	2760.32	17520.5	3588.4	7186.42
1882.04	1639.98	1361.56	1608.85	1087.4		914.613	3044.6	14492.4	6774.44	6929.61
1858.77	1663.42	1405.28	850.284	1766.33		3831.49	5204.79	4553.84	14172.3	276.031
1900.56	1609.15	1427.29	567.39	1619.43		1181.03	3823.25	5285.81	21421.9	2173.91
1871.96	1618.81	1469.42	661.302	1664.17		1598.51	10350.5	11210.2	14489.6	1866.3
1838.82	1658.36	1449.42	519.631	1702.1		1153.57	3375.56	4832.62	21375.2	1623.23
1447.66	1681.75	1409.98	1199.79	1691.58		15195.5	2963.57	8031.02	18288.1	950.315
	1652.45	1440.67	1177.53	1682.66			2551.58	5370.95	12977.6	1499.63
	1636.1	1427.84	1019.76	1746.63			4394.55	5910.66	9596.57	1535.34
	1724.84	1486.92	948.307	1733.22			1858.07	8194.44	12550.5	880.277
	1802.81	1455.51	485.578	1637.34			1753.7	4111.64	11777.4	1507.87
	1784.23	1494.99	765.982				1532.6	4279.18	56166.3
	1762.58	1511.25	10117.8				1760.56	9533.41	42778
	1793.67	1529.08					1682.29	2636.72
	1736.56	1592.64					2517.25	3116
	1710.57	1565.58					2298.9	4178.93
	1738.87	1585.64					720.98	3830.12
	1781.04	1542.98					1837.47	8348.25
	1750.61	1575.07					1378.79	4275.06
	1763.91	1526.06					1121.98	3681.8
	1724.47	1556.88					1557.32	3334.36
	1832.66	1647.64					653.689	2397.77
	1818.5	1632.91					726.473	4206.4
	1841.38	1670.04					1330.72	8874.22
	1197.47	1619.9					11042.7	4340.98
	990.858	1605.08					15379.5	6337.75
	401.442	1647.54					43769.7	2916.88
	558.839	1737.1					9335.66	5103.16
	160.728	1718.48					15114.5	3116
	147.42	1756.38					23904.9	3381.05
	374.92	1710.72					36702.6	2682.04
	320.543	1083.22					32858.8	19283.8
	625.446						11881.7
	821.664						47963.7
	865.297						30901.8
	947.283						35307.4
	1486.29						13347
	474.815						39545.4

## Sheet: figure 6E
48 hpf					9dpf			12dpf				16dpf				20dpf		24dpf
sphericity					sphericity			sphericity				sphericity				sphericity		sphericity
WT 1	WT 2	WT 3	WT 5		WT 1	WT 2		WT 1	WT 2	WT 3		WT1	WT2	WT3		WT 1		WT 1
0.574725	0.593772	0.54999	0.537985		0.586209	0.528337		0.492158	0.526163	0.598832		0.520708	0.489118	0.558084		0.52276		0.433558
0.586752	0.600379	0.54675	0.547662		0.6146	0.514606		0.47299	0.461616	0.538357		0.527742	0.525247	0.541316		0.413067		0.502454
0.689019	0.609632	0.554801	0.513799		0.629621	0.536421		0.499798	0.482922	0.527869		0.593093	0.526734	0.531252		0.554504		0.424765
0.5571	0.600935	0.575324	0.600819		0.581725	0.542085		0.490142	0.503922	0.557554		0.527758	0.489032	0.551619		0.449725		0.484236
0.515938	0.592489	0.561094	0.564714		0.604455	0.506905		0.395233	0.539824	0.543628		0.515031	0.54507	0.531408		0.509226		0.409069
0.538228	0.579391	0.524783	0.602838		0.593495	0.516611		0.518202	0.56493	0.583688		0.506687	0.500451	0.526204		0.495497		0.476473
0.559338	0.575875	0.564386	0.606635		0.619678	0.503136		0.440204	0.518919	0.578717		0.562426	0.547118	0.561845		0.48783		0.475585
0.556662	0.585462	0.557072	0.619167		0.563602	0.485496		0.48726	0.501533	0.515768		0.573352	0.514123	0.528013		0.450661		0.481504
0.586561	0.621994	0.542534	0.592977		0.630667	0.528668		0.48596	0.566319	0.560411		0.540513	0.497278	0.561257		0.503198		0.481643
0.603343	0.634318	0.597399	0.5932		0.588731	0.51754		0.513259	0.555946	0.548977		0.545894	0.531343	0.508253		0.466084		0.460535
0.548787	0.56029	0.527971	0.574867		0.561888	0.470971		0.555034	0.558121	0.531387		0.541059	0.511609	0.539631		0.504404		0.480833
0.572967	0.592663	0.533783	0.576863		0.572381	0.471352		0.550872	0.537489	0.510866		0.50545	0.481856	0.567243		0.534129		0.477548
0.549435	0.582913	0.560262	0.603153		0.588732	0.522667		0.540975	0.550048	0.515676		0.500824	0.484035	0.547823		0.477592		0.513982
0.591371	0.569256	0.563825	0.594745		0.614549	0.43022		0.537395	0.545595	0.475316		0.561777	0.544353	0.556877		0.505099		0.490258
0.598973	0.578289	0.53731	0.5704		0.596173	0.527249		0.517888	0.555703	0.516142		0.564765	0.555712	0.542827		0.542159		0.534687
0.571247	0.563434	0.543183	0.562916		0.563088	0.495856		0.463837	0.561297	0.549973		0.573109	0.510107	0.567135		0.552653		0.507944
0.570101	0.61147	0.52925	0.585035		0.553484	0.507254		0.492794	0.543965	0.505238		0.530466	0.56899	0.53513		0.536794		0.450001
0.538533	0.605511	0.567343	0.572332		0.57636	0.530511		0.544972	0.537099	0.534662		0.569692	0.551407	0.605564		0.51252		0.497664
0.603053	0.550645	0.53946	0.598746		0.590236	0.417716		0.540068	0.555998	0.528059		0.545966	0.541069	0.561014		0.524495		0.506939
0.607061	0.613048	0.528187	0.595512		0.559354	0.556941		0.520088	0.54524	0.497325		0.585875	0.519335	0.556593		0.550749		0.465322
0.585446	0.543566	0.571213	0.615792		0.627131	0.557758		0.515433	0.571174	0.543443		0.581454	0.494103	0.604706		0.567755		0.500073
0.559093	0.593753	0.532693	0.513789		0.59146	0.499182		0.568868	0.565395	0.546346		0.552499	0.534063	0.534722		0.492892		0.437747
0.589134	0.582098	0.499648	0.574273		0.587453	0.546927		0.543585	0.561419	0.544426		0.52607	0.550471	0.589729		0.589839		0.469099
0.580232	0.60116	0.521326	0.615091		0.617218	0.594196		0.55834	0.559125	0.534714		0.601665	0.535892	0.49869		0.459898		0.505607
0.589636	0.615365	0.589707	0.582825		0.555311	0.55256		0.578947	0.5457	0.520848		0.541035	0.545908	0.58714		0.549676		0.614665
0.596419	0.603471	0.609111	0.613672		0.561888	0.541589		0.570298	0.549163	0.568671		0.555819	0.557341	0.556841		0.529352		0.457062
0.590468	0.621866	0.594663	0.608835		0.534728	0.514323		0.558096	0.575951	0.56107		0.577461	0.567764	0.524318		0.549422		0.497193
0.596075	0.607538	0.581351	0.585631		0.579307	0.541518		0.587114	0.578272	0.563023		0.55325	0.546622	0.479333		0.497195		0.528981
0.586437	0.603173	0.609798	0.596493		0.55716	0.575931		0.553046	0.560026	0.519396		0.515091	0.501989	0.522419		0.476359		0.510558
0.551766	0.600944	0.582391	0.60622		0.562126	0.523205		0.495351	0.546309	0.529692		0.566787	0.505751	0.543694		0.525128		0.515823
0.568679	0.605013	0.576058	0.605072		0.553161	0.571393		0.571713	0.573039	0.564551		0.528975	0.55414	0.505632		0.486228		0.518876
0.615081	0.599328	0.569142	0.579302		0.599403	0.563308		0.574059	0.55661	0.539991		0.591541	0.55314	0.555199		0.482473		0.522169
0.599054	0.620663	0.549546	0.612425		0.568262	0.586065		0.552825	0.566916	0.542843		0.547475	0.562254	0.557269		0.443222		0.519057
0.613533	0.61252	0.593964	0.577334		0.565496	0.562323		0.526999	0.578571	0.487338		0.587813	0.523008	0.572902		0.580755		0.532445
0.610312	0.651799	0.603784	0.586996		0.560356	0.553217		0.558106	0.564729	0.494628		0.543977	0.505027	0.49768		0.489869		0.510754
0.595904	0.536244	0.556894	0.597369		0.565147	0.606084		0.584551	0.606748	0.509174		0.535719	0.533041	0.566632		0.511152		0.489455
0.601753	0.61539	0.611777	0.614756		0.598488	0.582211		0.56434	0.580602	0.559836		0.518089	0.529661	0.518171		0.56384		0.538081
0.645784	0.639596	0.563501	0.588103		0.560716	0.568839		0.529541	0.579931	0.581154		0.510076	0.546541	0.659568		0.52053		0.523181
0.613577	0.602564	0.581727	0.537091		0.561658	0.581714		0.564193	0.530089	0.566966		0.525003	0.561015	0.562906		0.540563		0.563542
0.605225	0.607634	0.605349	0.61302		0.587007	0.574525		0.561225	0.591112	0.564473		0.543473	0.542468	0.58236		0.566298		0.5462
0.609728	0.596948	0.593719	0.60597		0.564828	0.57837		0.535432	0.561007	0.614557		0.562679	0.571126	0.503445		0.540274		0.556416
0.598855	0.614081	0.565692	0.597522		0.484431	0.579919		0.551449	0.547911	0.595124		0.555668	0.546955	0.597452		0.516011		0.447146
0.619203	0.566551	0.491928	0.574784		0.525155	0.580849		0.570823	0.541918	0.532378		0.524429	0.563798	0.561428		0.548763		0.382716
0.597644	0.599185	0.607306	0.60608		0.495248	0.620259		0.550804	0.533833	0.539868		0.574868	0.520914	0.595768		0.566019		0.491295
0.616104	0.601323	0.601009	0.560813		0.583778	0.550621		0.568717	0.528864	0.562598		0.586988	0.560006	0.489249		0.535083		0.45609
0.569933	0.634366	0.567761	0.61566		0.533282	0.54885		0.576338	0.575494	0.569254		0.544634	0.559682	0.621711		0.579687		0.465902
0.569869	0.602792	0.624557	0.600886		0.511517	0.599753		0.49519	0.56629	0.61596		0.556965	0.523277	0.526032		0.518366		0.31749
0.638848	0.617266	0.63085	0.612594		0.533467	0.630757		0.533745	0.595834	0.613064		0.601429	0.522244	0.597788		0.568283		0.483836
0.631893	0.621637	0.608336	0.560605		0.509112	0.594582		0.58469	0.561188	0.605641		0.469428	0.541063	0.55086		0.538839		0.483575
0.581581	0.608807	0.593379	0.611837		0.539692	0.568852		0.510841	0.537493	0.599895		0.550143	0.543332	0.627652		0.506404		0.411273
0.57618	0.55709	0.544456	0.608274		0.558785	0.596915		0.549436	0.588946	0.529385		0.542127	0.538498	0.530387		0.445005		0.434767
0.635458	0.575441	0.608974	0.582737		0.519154	0.564399		0.554304	0.574969	0.600263		0.566297	0.522139	0.63084		0.551823		0.478741
0.585582	0.596753	0.585794	0.579486		0.523054	0.598383		0.593626	0.568611	0.585959		0.526141	0.577207	0.596291		0.484218		0.440933
0.603121	0.622367	0.603872	0.623035		0.545767	0.602504		0.574108	0.578357	0.60916		0.623886	0.528958	0.49534		0.538252		0.435165
0.586808	0.616259	0.602004	0.62966		0.492549	0.613127		0.58883	0.543324	0.590252		0.56914	0.544316	0.516948		0.562646		0.448364
0.574049	0.572664	0.615562	0.612666		0.538176	0.619445		0.584461	0.569313	0.599354		0.560579	0.545962	0.620171		0.481196		0.475598
0.601207	0.577639	0.6145	0.572685		0.537449	0.617445		0.559562	0.547746	0.601467		0.536976	0.573784	0.607924		0.461451		0.472652
0.61246	0.550033	0.589568	0.575246		0.551648	0.633484		0.561585	0.556532	0.589859		0.545285	0.553715	0.569551		0.454487
0.585831	0.634639	0.579665	0.60699		0.526799	0.639906		0.586758	0.576421	0.610225		0.46924	0.54047	0.557816		0.516854
0.61838	0.568626	0.579589	0.604822		0.532095	0.613559		0.562923	0.56441	0.589705		0.591167	0.571329	0.441399		0.565701
0.629218	0.620384	0.573383	0.613706		0.542557	0.618963		0.623356	0.553481	0.54397		0.582772	0.533743	0.504335		0.52462
0.610934	0.621127	0.620217	0.632525		0.647329	0.567752		0.622648	0.577787	0.590106		0.669457	0.56141	0.56081		0.496416
0.633282	0.616582	0.641247	0.595906		0.547688	0.561936		0.584914	0.609428	0.538262		0.585052	0.521672	0.497681		0.523678
0.575438	0.571663	0.602698	0.565444		0.58015	0.603089		0.54864	0.617386	0.546803		0.506589	0.56393	0.51407		0.544251
0.61555	0.618856	0.582148	0.599246		0.57425	0.562799		0.5506	0.580103	0.577117		0.5081	0.547358	0.500765		0.554933
0.59595	0.617649	0.634352	0.603457		0.593862	0.594303		0.601186	0.603319	0.576287		0.47958	0.499845	0.512629		0.542381
0.604238	0.587166	0.602503	0.610727		0.614011	0.537407		0.584899	0.499911	0.558906		0.562567	0.593386	0.584888		0.492853
0.618975	0.570774	0.61501	0.595132		0.645646	0.603157		0.594454	0.592556	0.580986		0.618281	0.534908	0.462232		0.558037
0.639382	0.610071	0.602657	0.58614		0.61344	0.578782		0.565302	0.553861	0.592892		0.60518	0.567069	0.461781		0.524834
0.612669	0.598109	0.588337	0.587389		0.61333	0.598898		0.548399	0.545833	0.5966		0.553552	0.524184	0.526882		0.495665
0.597385	0.602286	0.606444	0.605831		0.613326	0.572826		0.586798	0.552298	0.574546		0.60656	0.493364	0.524654		0.534621
0.606796	0.595318	0.611298	0.623361		0.620029	0.634403		0.585277	0.558956	0.619655		0.640415	0.518079	0.516338		0.484191
0.599922	0.599501	0.595466	0.620013		0.609889	0.577376		0.5632	0.540805	0.558221		0.563032	0.56513	0.529314		0.550361
0.607337	0.628182	0.589168	0.603942		0.547198	0.595364		0.578241	0.503017	0.585833		0.588936	0.55057	0.447019		0.49163
0.630951	0.618934	0.595535	0.603959		0.596433	0.583425		0.605404	0.55846	0.527394		0.539217	0.477685	0.558774		0.491966
0.644439	0.588679	0.581388	0.608853		0.601374	0.603364		0.556683	0.548208	0.581212		0.600129	0.532432	0.518088		0.553517
0.577491	0.61182	0.643384	0.575451		0.630407	0.566998		0.566337	0.59468	0.591598		0.581464	0.569835	0.450974		0.524127
0.621949	0.642009	0.621958	0.614932		0.618845	0.587389		0.602942	0.563954	0.568056		0.564461	0.52137	0.483263		0.534694
0.59951	0.632171	0.622761	0.618913		0.599972	0.525518		0.574172	0.641277	0.591884		0.607673	0.481277	0.504204		0.493468
0.63201	0.581967	0.604082	0.578611		0.59473	0.599047		0.561235	0.62625	0.581082		0.586623	0.565384	0.492134		0.52351
0.617022	0.619688	0.608875	0.608825		0.623524	0.582203		0.588519	0.556206	0.614783		0.540933	0.447054	0.526108		0.466543
0.631683	0.618389	0.630708	0.605476		0.594678	0.636116		0.558531	0.509134	0.542655		0.473635	0.547336			0.532383
0.582438	0.601121	0.602477	0.623563		0.580239	0.573357		0.585531	0.453597	0.555306		0.558087	0.483214			0.469811
0.634109	0.586091	0.58137	0.583597		0.508182	0.568648		0.587477	0.520182	0.634116		0.519807	0.524823			0.465128
0.582204	0.596351	0.649321	0.619471		0.542799	0.59305		0.586173	0.525897	0.60325		0.532277	0.524927			0.523763
0.655598	0.578502	0.576899	0.585425		0.564355	0.565449		0.612974	0.512149	0.591432		0.563848	0.544701			0.500633
0.617586	0.644951	0.623117	0.575734		0.575956	0.557412		0.592904	0.523362	0.528785		0.51157	0.532261			0.519339
0.588396	0.625512	0.635253	0.605414		0.598564	0.540477		0.551982	0.514331	0.571715		0.55853	0.542196			0.501878
0.636423	0.651348	0.612373	0.584453		0.514924	0.525241		0.550158	0.577903	0.51649		0.559385	0.503039			0.479834
0.593678	0.635291	0.587618	0.572154		0.537851	0.583066		0.628165	0.559684	0.550946		0.515916	0.475485			0.520024
0.585287	0.630946	0.629256	0.569964		0.525164	0.558053		0.625994	0.593533	0.550708		0.528452	0.585239			0.53465
0.591375	0.617983	0.536734	0.624618		0.543741	0.588808		0.608272	0.586354	0.564389		0.539911	0.547082			0.524767
0.612909	0.593989	0.618472	0.615139		0.552175	0.577463		0.597337	0.556333	0.600875		0.489122	0.54472			0.508194
0.528013	0.643615	0.612345	0.61625		0.5333	0.600237		0.56191	0.569096	0.545658		0.458108	0.626594			0.461798
0.570336	0.626106	0.555524	0.588383		0.551123	0.601593		0.56893	0.586582	0.581046		0.531561	0.487447			0.505038
0.573653	0.629242	0.60512	0.618805		0.577557	0.565454		0.576477	0.558872	0.551857		0.510044	0.519599			0.510897
0.569015	0.665913	0.615153	0.610951		0.557195	0.586531		0.548134	0.568447	0.528217		0.497457	0.505651			0.495747
0.561837	0.626512	0.6089	0.611232		0.552475	0.590146		0.533475	0.579828	0.590996		0.574962	0.58679			0.513933
0.593357	0.619127	0.582219	0.607852		0.545696	0.533938		0.520903	0.634716	0.535585		0.524622	0.569882			0.498302
0.611252	0.622915	0.59501	0.615255		0.550429	0.583523		0.552562	0.473736	0.536658		0.497428	0.558534			0.573692
0.599207	0.622247	0.585481	0.649553		0.535838	0.632769		0.562964	0.505115	0.5876		0.552613	0.598188			0.553946
0.620338	0.627986	0.647606	0.623668		0.515112	0.613749		0.544465	0.513497	0.579704		0.506793	0.591708			0.538979
0.580032	0.579479	0.63516	0.58097		0.523039	0.644513		0.556205	0.550018	0.569328		0.472339	0.580333			0.488931
0.594954	0.613384	0.579972	0.601343		0.605709	0.498515		0.581375	0.520408	0.543449		0.381974	0.580214			0.467504
0.579167	0.601975	0.565161	0.588034		0.52689	0.523393		0.594329	0.590801	0.543458		0.536245	0.605394			0.456603
0.5514	0.595289	0.648033	0.589668		0.567661	0.566114		0.593755	0.571928	0.578898		0.555317	0.525421			0.472265
0.59641	0.624312	0.577111	0.57863		0.499544	0.512718		0.565265	0.578614	0.578835		0.494921	0.530971			0.491865
0.576446	0.576933	0.570321	0.595396		0.524961	0.558803		0.591096	0.520424	0.586869		0.542947	0.491181			0.473299
0.583069	0.567291	0.56861	0.586426		0.537285	0.520918		0.606549	0.532265	0.579144		0.505213	0.559676			0.529231
0.567434	0.625196	0.589646	0.563815		0.603252	0.56978		0.587283	0.520001	0.564642		0.563175	0.501649			0.473847
0.614285	0.585453	0.583656	0.597639		0.507777	0.563951		0.502121	0.540622	0.528285		0.457692	0.50285			0.482671
0.589896	0.61343	0.574112	0.580597		0.477305	0.557716		0.469068	0.543984	0.601358		0.49775	0.518287			0.491789
0.631978	0.624246	0.605751	0.561873		0.485062	0.602711		0.593616	0.475941	0.585482		0.554686	0.547118			0.538524
0.60678	0.621118	0.607467	0.63034		0.538403	0.312536		0.528316	0.519689	0.577808		0.530195	0.516169			0.481981
0.604846	0.612135	0.619596	0.601831		0.538006	0.466484		0.492825	0.649618	0.572363		0.503232				0.494947
0.643773	0.588329	0.607713	0.59687		0.57007	0.357622		0.645279	0.585437	0.523222		0.512217				0.576672
0.605436	0.570307	0.675424	0.557621		0.56142	0.450334		0.610014	0.552112	0.579716		0.464512
0.631495	0.587627	0.621215	0.609707		0.526236	0.562776		0.528164	0.552246	0.558473		0.46378
0.628837	0.570331	0.594489	0.566131		0.544712	0.597201		0.52157	0.55467	0.571058		0.481231
0.666679	0.576328	0.634869	0.597391		0.574735	0.513572		0.637031	0.509692	0.578906		0.488887
0.595293	0.595334	0.674386	0.538609		0.533606	0.512729		0.524973	0.500426	0.581823		0.519982
0.611054	0.555506	0.677781	0.601736		0.546447	0.478104		0.492766	0.490059	0.628786		0.524219
0.596813	0.582509	0.653787	0.629132		0.616637	0.549043		0.633605	0.526994	0.616733		0.571078
0.568732	0.584348	0.595658	0.594323		0.583285	0.481045		0.642554	0.449391	0.604449		0.520196
0.60012	0.552666	0.643057	0.643942		0.544477	0.574387			0.515649	0.531555		0.47448
0.620224	0.583292	0.611923	0.639381		0.593088	0.528085			0.51933	0.504048		0.529598
0.56906	0.581926	0.515504	0.623018		0.581569	0.56422				0.641277		0.432601
0.599939	0.586409	0.521901	0.584473		0.647076	0.563593				0.653573		0.467486
0.607281	0.602325	0.551821	0.609131		0.522313	0.576777				0.658262		0.508653
0.678309	0.593589	0.638331	0.625454		0.517774	0.460701				0.49911		0.587778
0.667458	0.601249	0.526158	0.610629		0.493029	0.396368				0.573466		0.48991
0.632197	0.619349	0.559366	0.576601		0.485183					0.534936		0.496138
0.666203	0.630165	0.606791	0.614105		0.524253					0.503321
0.613347	0.633837	0.585357	0.626626		0.544069					0.470064
0.564036	0.658325	0.569545	0.634894		0.388967					0.490577
0.497085	0.623076	0.562237	0.518619		0.557487					0.522833
0.511865	0.643483	0.645834	0.562877		0.502981
0.563604	0.591665	0.608891	0.56764		0.473224
0.581956	0.638299				0.534984
0.59469	0.551025				0.535263
0.579345
0.508089
0.554333

## Sheet: figure  8D
14dpf WT	volume		14dpf spzl	volume
8.1	851		10.1	781
9.1	718		10.2	394
11.1	739		10.3	645
12.1	522		12.1	793
14.1	1149		12.2	806
26.1	882		14.1	2613
52.1	1373		15.1	3022
55.1	1244		17.1	923
58.1	1049		19.1	370
60.1	859		19.3	639
61.1	1063		27.1	1069
65.1	796		28.1	1569
72.1	643		29.1	619
75.1	762		29.2	1226
75.2	787		29.3	360
75.3	708		30.1	623
76.1	915		30.2	757
77.1	1036		35.1	322
			35.2	917
			35.3	678
			36.2	794
			36.3	1189

[truncated: 7 more sheets: figure 8G, fig 9C angle of kinking, figure 9F noto def. index, figure 10E vertebral sym. index, Figure 9H canal diameter, Figure 9H canal diameter., Sup figure 1C]
