# Supplementary material for: Notochord vacuoles absorb compressive bone growth during zebrafish spine formation
Source: eLife journal article supplement (doi:10.7554/elife.51221), 2020-01-29
Supplement: supp [file elife-51221-supp-v1.zip]

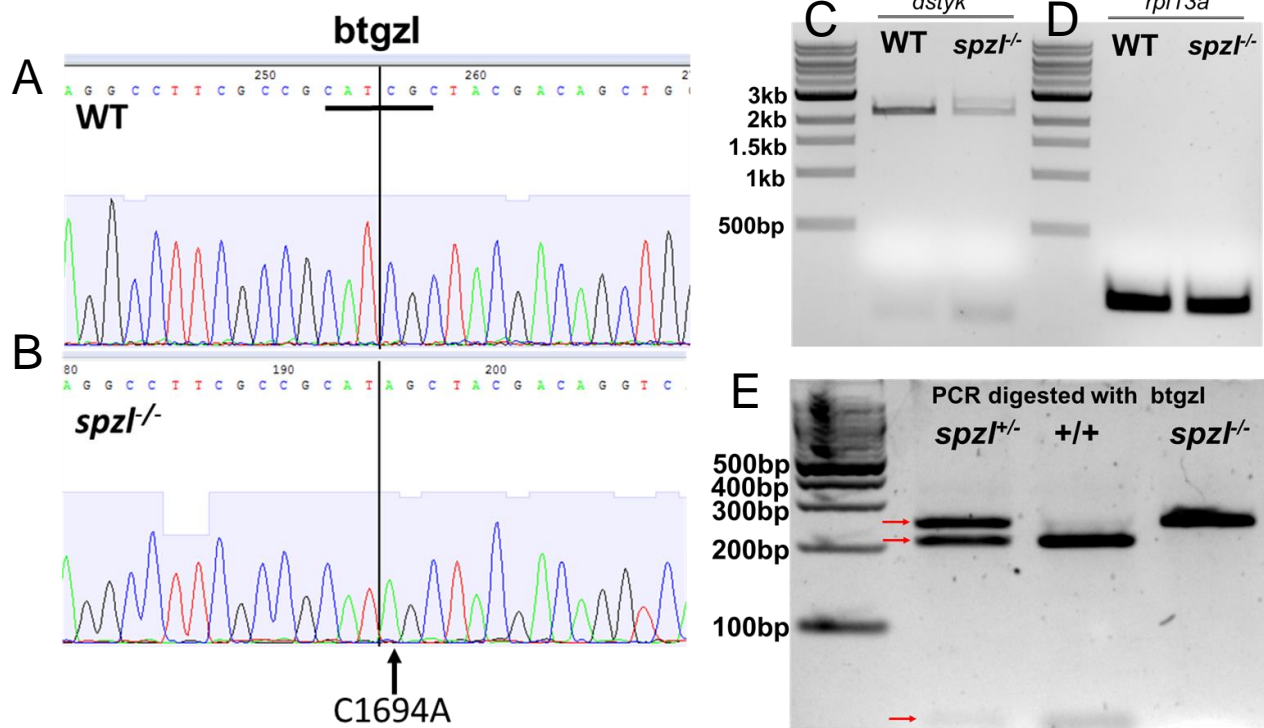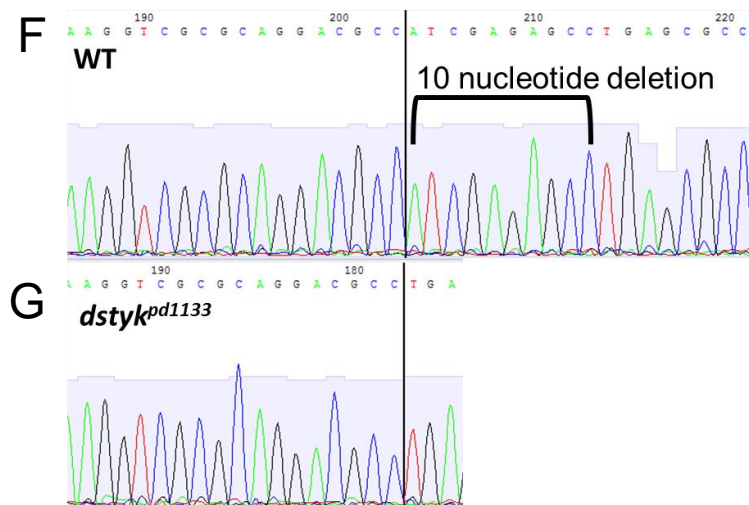

**H**

|                                |                                                                |     |
|--------------------------------|----------------------------------------------------------------|-----|
| Wt                             | ...ISQIQDLIVNRLNQAVANKLTNSVDYLRSEFVGTLEKSTPESCAHNVTSNHLK       | 480 |
| <i>Spz1</i> <sup>-/-</sup>     | ...ISQIQDLIVNRLNQAVANKLTNSVDYLRSEFVGTLEKSTPESCAHNVTSNHLK       | 480 |
| <i>dstyk</i> <sub>pd1133</sub> | ...ISQIQDLIVNRLNQAVANKLTNSVDYLRSEFVGTLEKSTPESCAHNVTSNHLK       | 480 |
| *****                          |                                                                |     |
| Wt                             | QILNAAYHVEVTFHSGSSVTRLFEQIKQIIHRITWVNPPAITAEWKRKVAQDAIESLSA    | 540 |
| <i>Spz1</i> <sup>-/-</sup>     | QILNAAYHVEVTFHSGSSVTRLFEQIKQIIHRITWVNPPAITAEWKRKVAQDAIESLSA    | 540 |
| <i>dstyk</i> <sub>pd1133</sub> | QILNAAYHVEVTFHSGSSVTRLFEQIKQIIHRITWVNPPAITAEWKRKVAQDA-----     | 534 |
| *****                          |                                                                |     |
| Wt                             | AKLAKSICSQFRTRLNSSHEAFAASLRQLEEGHTGLERTEDLWLRVRKDHAPRLARLSL... | 600 |
| <i>Spz1</i> <sup>-/-</sup>     | AKLAKSICSQFRTRLNSSHEAFAA-----                                  | 564 |
| <i>dstyk</i> <sub>pd1133</sub> | -----                                                          | 534 |
