# Supplementary figures and images for: Notochord vacuoles absorb compressive bone growth during zebrafish spine formation
Source: eLife journal article supplement (doi:10.7554/elife.51221), 2020-01-29

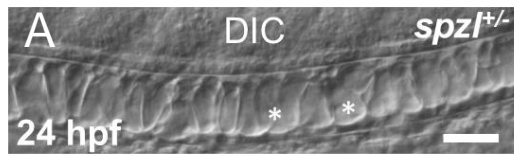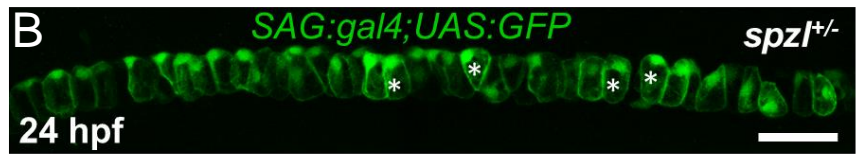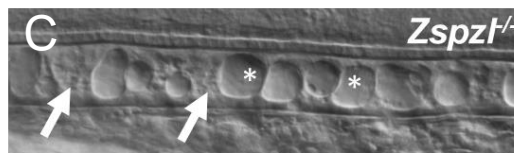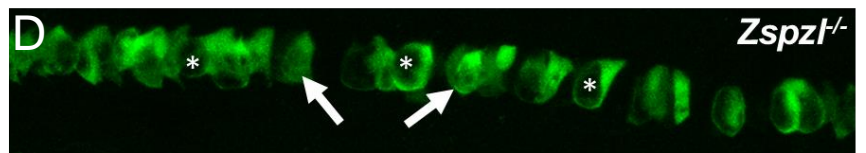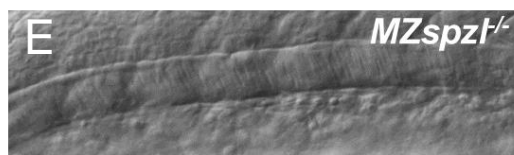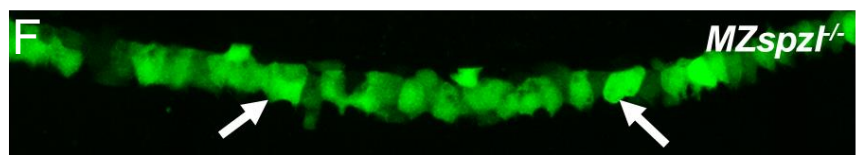

Supplement: supp [file elife-51221-supp-v1.zip]

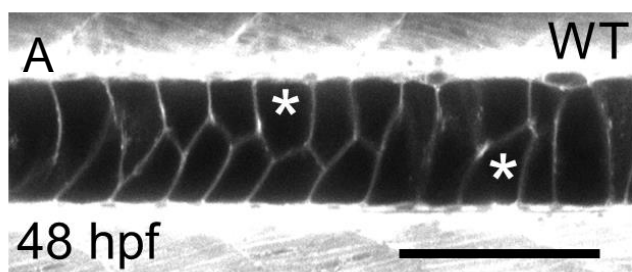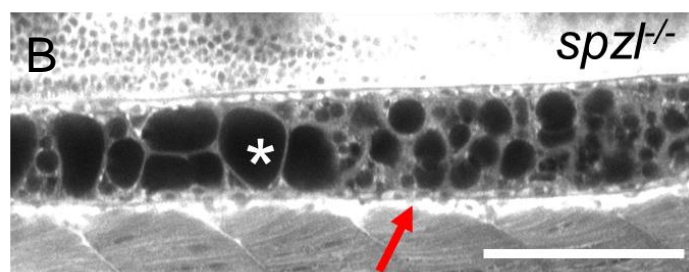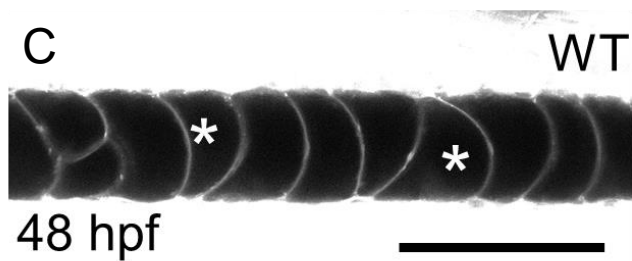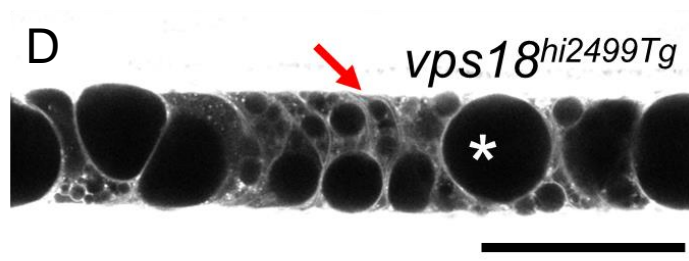

Supplement: supp [file elife-51221-supp-v1.zip]

A

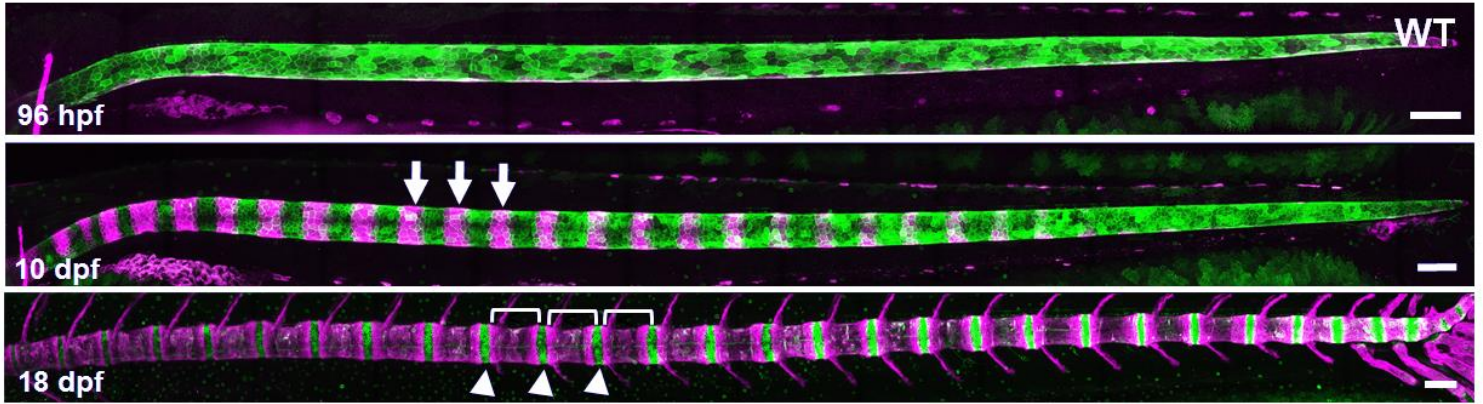

B

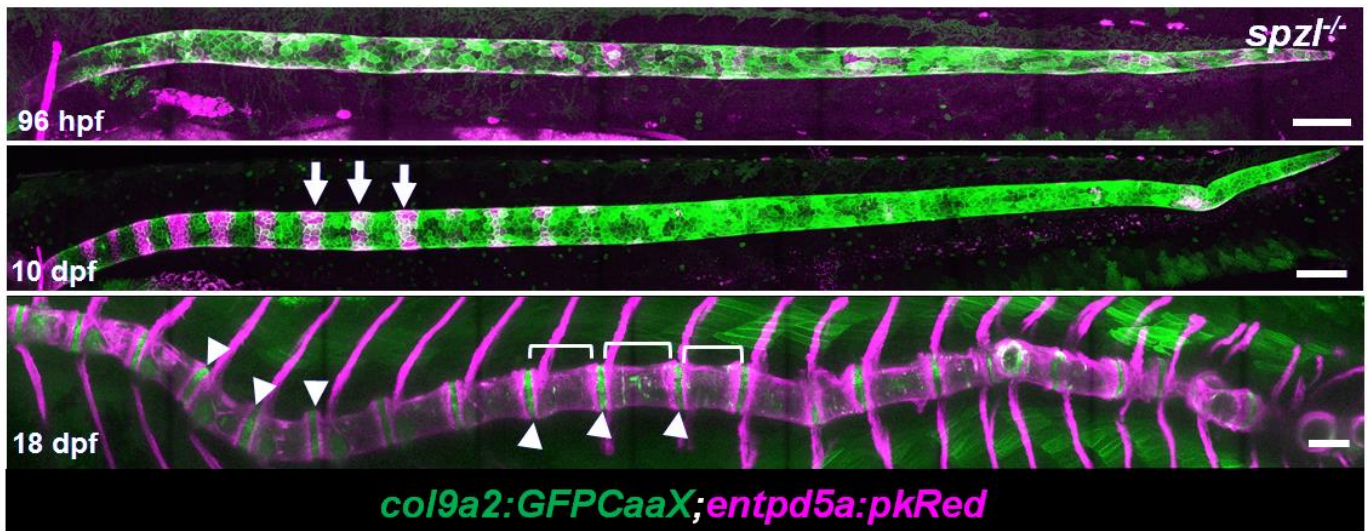

Supplement: supp [file elife-51221-supp-v1.zip]

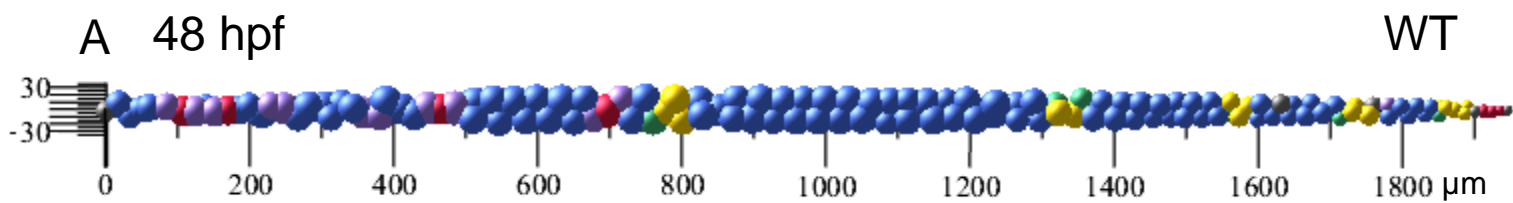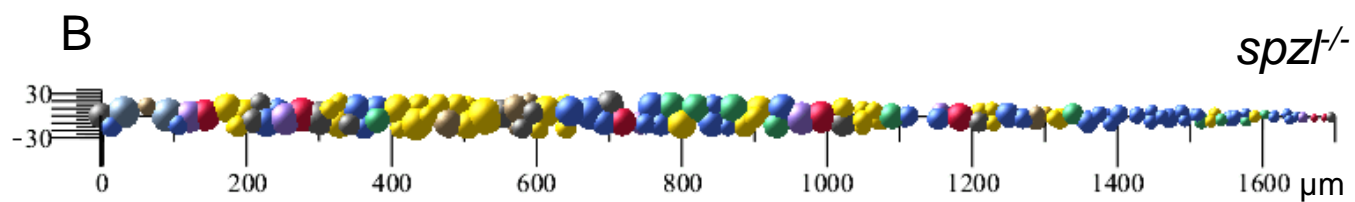

(2,1,1) ● (3,2,1) ●

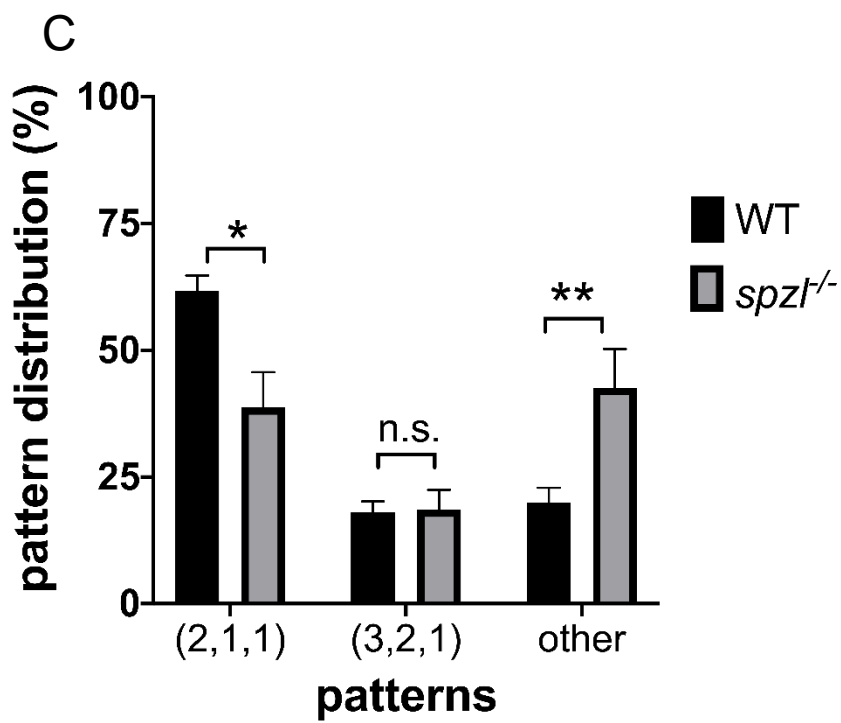

Supplement: supp [file elife-51221-supp-v1.zip]

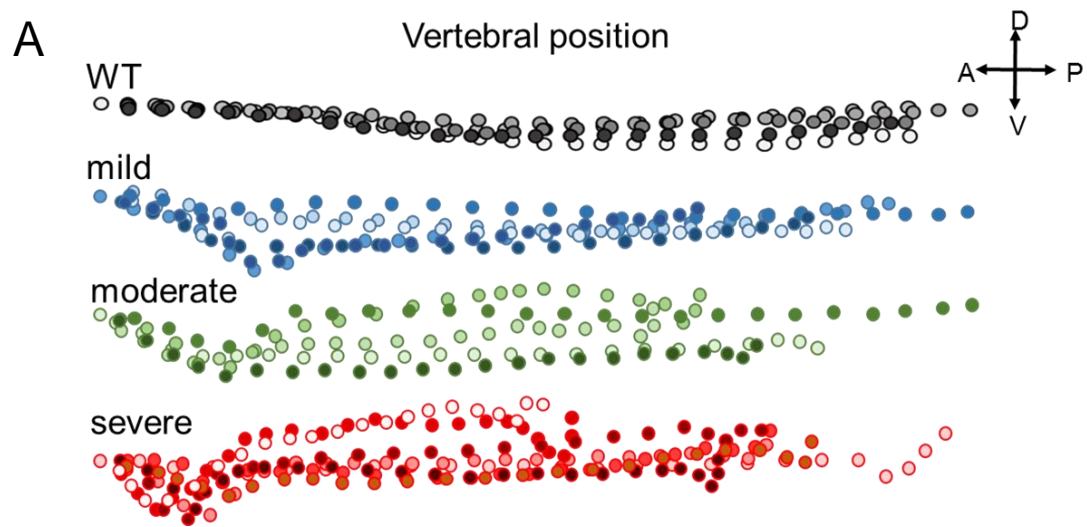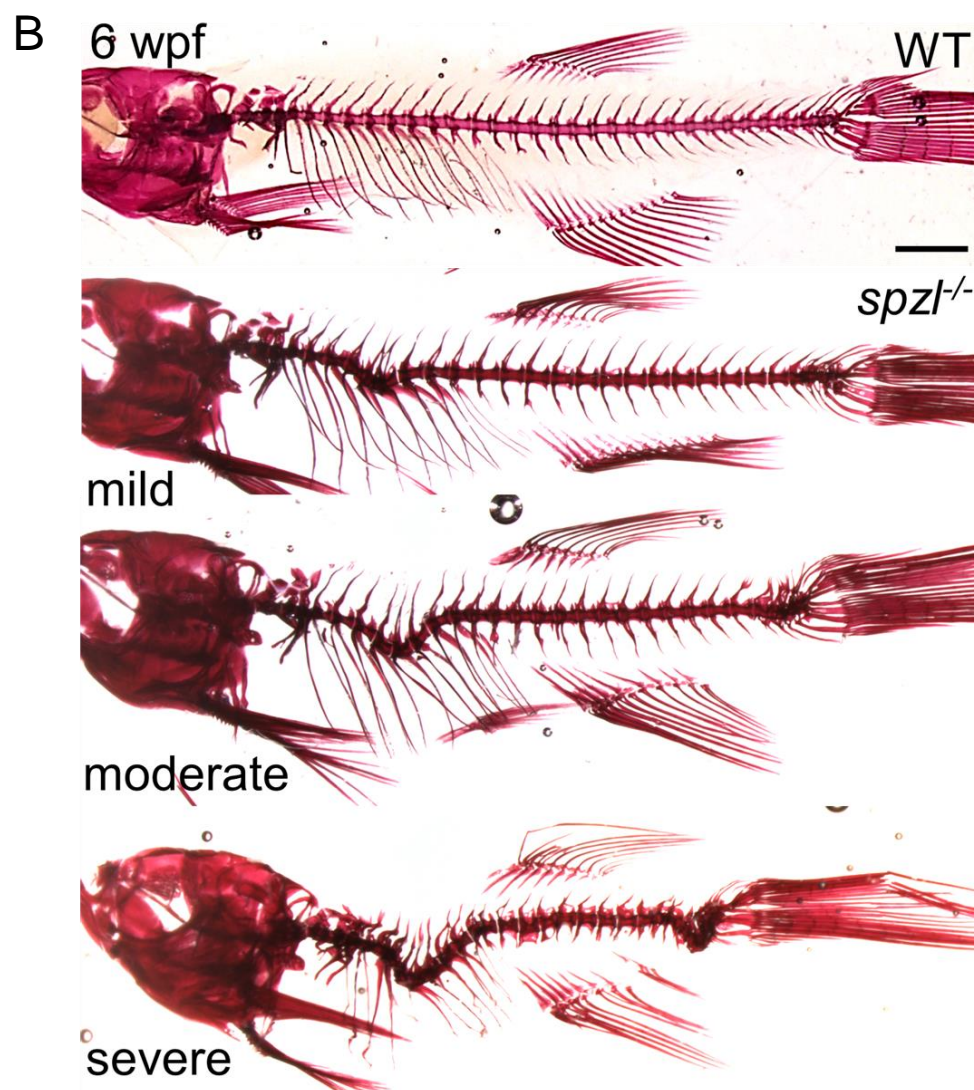

Supplement: supp [file elife-51221-supp-v1.zip]

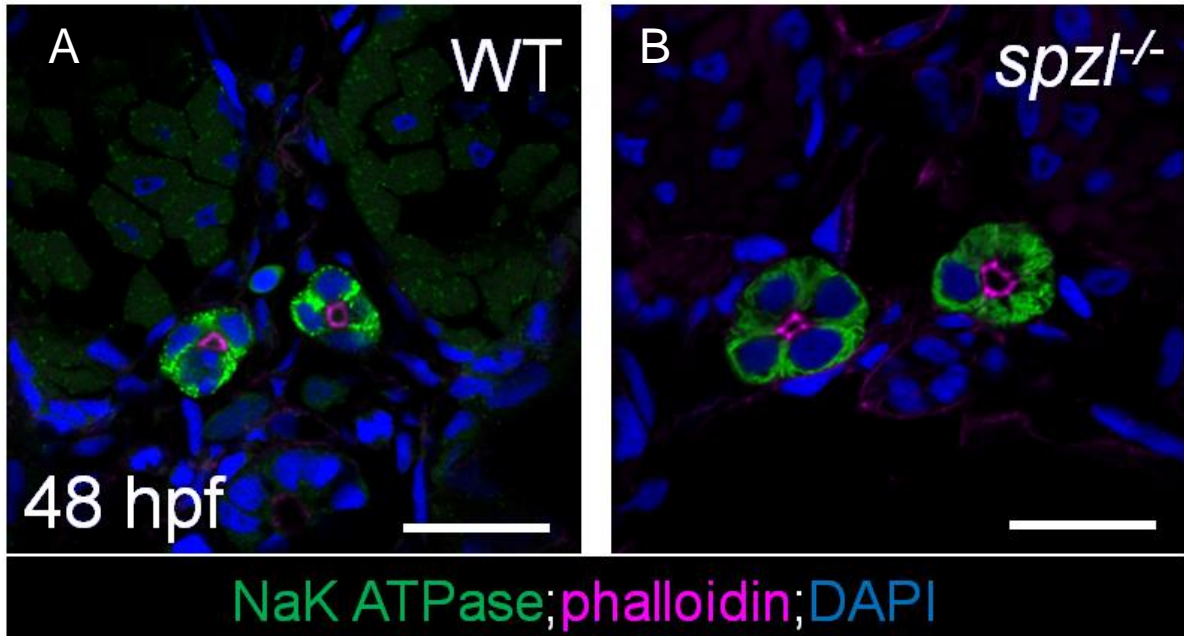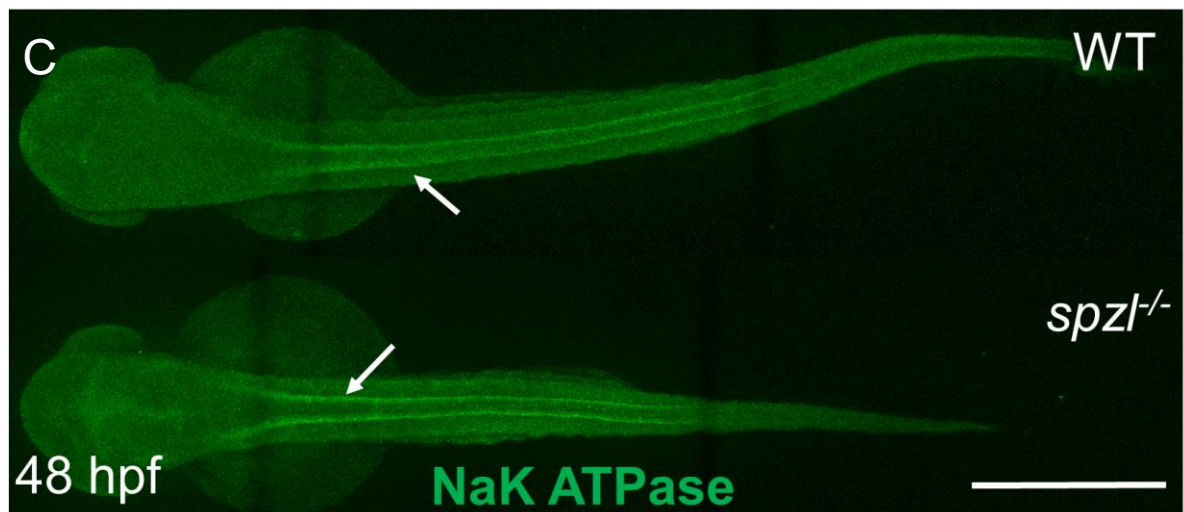

Supplement: supp [file elife-51221-supp-v1.zip]

***dstyk***

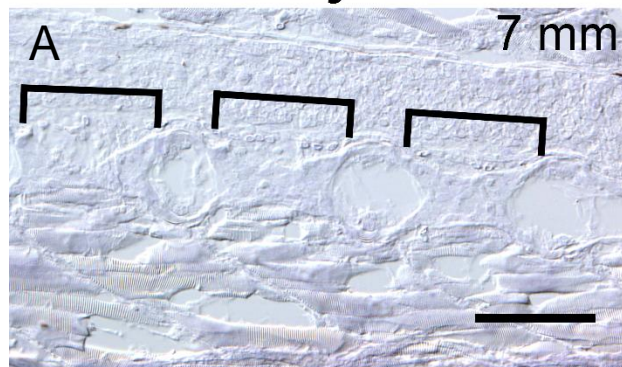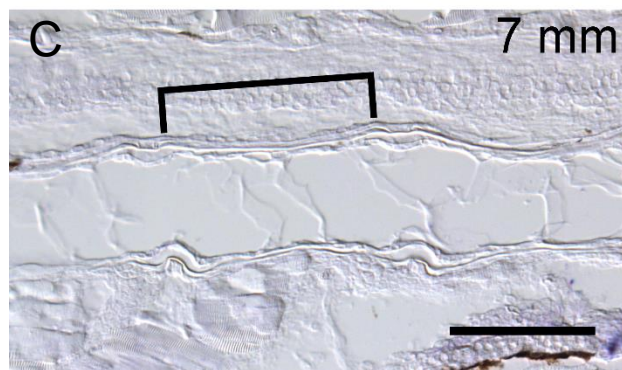

***osx***

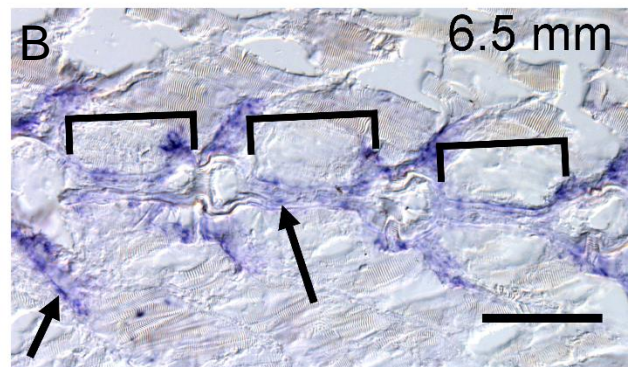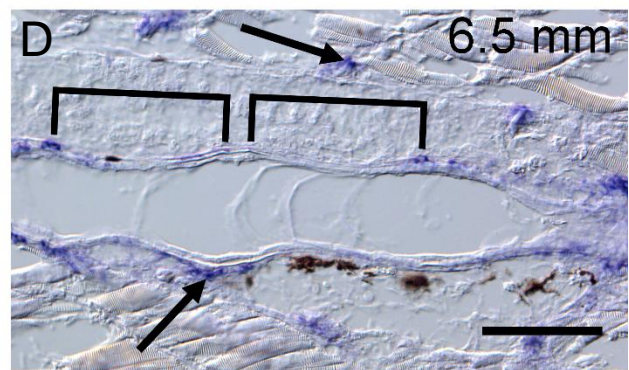

Supplement: supp [file elife-51221-supp-v1.zip]
